# Supplementary material for: Neuronal transcriptome analyses reveal novel neuropeptide modulators of excitation and inhibition imbalance in C. elegans
Source: PLoS One. 2020 Jun 4;15(6):e0233991. doi: 10.1371/journal.pone.0233991 (PMC7272019; doi:10.1371/journal.pone.0233991)
Supplement: S2 Table — (XLSX) [file pone.0233991.s003.xlsx]

## Sheet: WT expressed
Gene	FPKM_sample1	FPKM_sample 2
aagr-3	95.185	50.8056
aakg-5	25.5358	30.9001
aap-1	25.7935	26.5387
aat-3	28.4656	19.5893
abi-1	31.9448	36.9635
abts-3	57.9965	96.1018
abts-4	17.1421	19.8809
acc-4	133.824	190.972
acdh-7	76.8962	49.0401
acl-14	34.8457	33.9533
acr-12	40.1806	50.17
acr-14	11.288	22.1793
acr-19	23.8316	38.2914
acr-2	58.2853	53.1454
acr-21	16.4809	28.0072
acr-24	15.4931	39.6042
acs-13	69.5514	69.8378
acs-4	79.4459	95.5398
acy-1	30.0549	60.5484
add-1	18.1424	21.4388
adr-1	19.4214	33.4175
aex-3	51.5853	110.183
aex-6	158.592	172.812
agl-1	18.2394	25.4068
ags-3	126.098	97.9871
aho-3	32.9959	50.5747
ain-1	77.9317	98.9914
ain-2	56.5009	55.3653
ajm-1	14.5816	21.2837
akap-1	183.187	271.319
akir-1	171.257	167.055
akt-1	118.249	106.408
aldo-1	1452.7	1766.6
alg-2	21.7548	15.2982
alh-4	69.7134	83.711
alr-1	26.774	80.7529
alx-1	30.6036	40.8404
aly-1	75.1107	67.7217
ampd-1	94.0464	79.8227
anat-1	124.425	189.833
ani-1	14.6106	23.0099
apa-2	73.2009	119.337
apb-1	49.0093	91.9702
apb-3	21.6537	44.5345
apc-11	40.1647	83.4375
aph-1	26.257	33.2337
apl-1	273.093	295.459
aps-2	338.834	320.457
aqp-2	754.696	362.02
arc-1	25.3961	25.8091
arf-1.2	594.848	556.962
arf-3	913.242	514.504
arl-8	170.484	252.622
arp-11	19.1413	30.7766
arp-6	19.4051	20.1891
arr-1	36.4618	34.3881
arrd-17	190.839	218.81
arrd-18	57.3787	62.2089
arrd-22	65.3081	86.4767
arrd-25	31.9027	37.8007
arrd-26	114.461	117.804
arrd-6	119.651	130.483
arx-2	46.9708	69.3262
asc-1	38.2589	37.8629
asic-1	17.8962	29.0087
asp-1	1726.03	740.864
asp-14	53.5587	29.9337
asp-6	1502.97	554.425
ast-1	67.0235	22.9823
atat-2	60.7779	84.2961
atf-5	169.695	210.144
atf-7	130.129	170.476
atg-13	38.528	56.8244
atg-18	122.388	124.038
atg-3	97.602	117.921
atg-5	36.7365	43.3682
atg-7	27.6524	28.1447
atgp-1	101.278	81.7007
atic-1	139.432	173.805
atx-2	32.4991	42.1287
avr-14	22.1915	34.6076
B0001.4	61.8103	73.9189
B0001.5	15.4679	17.6103
B0035.1	73.3199	61.4318
B0041.5	23.038	37.0863
B0207.10	341.55	297.161
B0207.6	14.7934	15.0661
B0228.6	47.3365	69.932
B0272.4	19.6715	25.237
B0302.5	65.9914	36.8933
B0303.4	11.5772	23.9678
B0303.7	28.3621	52.6331
B0334.5	15.9912	19.2084
B0336.13	51.1014	68.1145
B0336.3	20.3945	29.8335
B0348.2	21.1903	35.1314
B0361.4	27.5883	43.6094
B0361.9	30.5831	22.0426
B0379.1	19.4812	49.5547
B0393.6	10.007	14.1275
B0393.8	43.6402	40.0066
B0393.8	43.6402	40.0066
B0393.8	43.6402	40.0066
B0393.8	43.6402	40.0066
B0395.3	90.1533	169.713
B0416.5	155.476	162.407
B0454.9	23.9744	19.1377
B0511.7	24.8317	31.6478
B0546.4	295.66	171.056
bar-1	34.8334	41.6517
bath-38	35.7458	37.4009
bath-42	61.7944	81.0389
bcat-1	143.949	145.918
bec-1	57.8119	35.9109
ben-1	519.414	1026.19
bir-1	77.1857	90.0588
blos-2	470.552	692.026
blos-4	13.5754	41.8863
bra-2	37.3577	44.5736
brap-2	16.79	30.935
bre-3	18.297	29.529
bris-1	44.4861	30.6329
brp-1	212.509	198.707
btbd-10	59.4186	73.6879
C01A2.4	108.385	127.122
C01F6.9	258.775	556.198
C01G6.5	25.2623	53.9306
C02B10.3	523.557	837.923
C02B10.5	33.7707	52.1584
C02B8.3	430.726	148.342
C02E7.6	135.978	92.5828
C02F5.12	11.7562	15.6215
C03A3.1	12.3665	19.2258
C04E6.7	46.5672	93.7265
C04F12.5	69.8389	72.6966
C04F5.8	34.2756	22.6319
C05C8.1	29.4247	51.6742
C05C8.2	16.5603	19.7622
C05D2.10	54.1711	87.57
C05E11.3	101.284	77.0016
C05G5.3	23.2912	18.2165
C06A1.2	477.307	716.176
C06A12.3	73.2168	90.0951
C06A6.2	18.7642	25.4214
C06E4.2	88.8083	24.8264
C06E7.2	94.7908	249.95
C07E3.3	44.8089	23.4429
C07H6.2	126.675	91.7871
C08E3.1	345.155	71.8138
C08E3.13	527.977	103.919
C09B7.2	42.1374	39.1141
C09G9.1	89.586	107.711
C11E4.6	17.6073	18.2022
C11H1.7	183.807	279.527
C12D8.1	119.175	111.62
C13A10.2	1489.74	1526.24
C13C4.4	76.5781	120.245
C13F10.1	25.9091	30.0042
C13G3.1	13.7334	20.6686
C14H10.1	15.7577	26.4578
C15C7.5	143.496	198.559
C15C8.7	174.961	157.278
C16A11.2	16.8112	18.0503
C16A3.2	26.9107	33.2852
C16B8.3	293.413	148.151
C16E9.2	20.419	29.2797
C17D12.5	29.6801	14.9365
C17E4.10	177.159	209.596
C17E4.6	48.4111	74.4198
C17H11.1	24.5515	35.429
C17H12.10	72.4544	72.8992
C18A11.1	107.198	56.5708
C18A11.2	78.9598	51.2273
C18A3.2	16.5124	25.2032
C18B12.4	57.8314	55.6902
C18B2.4	197.61	193.33
C18D11.1	10.2403	10.9359
C18E3.9	13.1136	16.2465
C18G1.1	25.348	51.8244
C23F12.4	51.8476	16.2812
C24A3.2	3940.05	3802.02
C24B5.1	79.2417	69.118
C25A1.4	52.4877	51.9176
C25E10.8	77.0475	56.7586
C25G4.2	197.788	127.147
C25H3.12	71.1921	53.2227
C26D10.6	61.3994	119.619
C27B7.2	13.8299	22.233
C29F9.1	12.1183	11.9867
C30A5.3	33.1774	53.9329
C30B5.2	134.574	153.116
C30F12.4	35.2995	26.8894
C31H1.8	25.553	33.2759
C31H5.4	696.166	572.604
C31H5.5	38.6824	117.152
C32C4.1	18.7918	16.0052
C32D5.3	48.0921	72.6493
C32F10.4	72.8817	29.0413
C33A12.4	419.605	364.53
C33H5.13	133.524	73.4475
C34D10.1	40.602	41.8425
C34E7.4	25.4634	21.7458
C35D10.12	25.9744	23.0375
C35D10.7	24.0016	18.9423
C35E7.11	207.264	205.303
C36E6.2	22.798	32.862
C36E8.1	38.9261	49.3287
C37A2.8	19.37	26.8821
C37C3.1	12.0591	15.3342
C39D10.7	110.607	197.88
C39E9.11	12.3712	27.6006
C39F7.1	31.3209	34.227
C43H6.3	360.346	363.031
C44H4.6	37.2926	112.563
C46H11.10	17.9469	14.1544
C47D2.1	83.8017	36.9022
C47E8.3	70.2962	64.3187
C48B6.10	1348.91	1071.4
C49C3.8	17.667	34.0383
C49G7.10	42.909	72.1771
C49G7.3	167.283	137.471
C49H3.6	26.979	48.1248
C49H3.9	26.3412	34.1598
C50B6.3	15.2423	15.897
C50B8.4	13.274	14.5289
C50D2.6	74.9261	79.2558
C50F4.6	196.36	113.255
C50F4.8	15.7129	18.2677
C53C9.2	23.9344	14.4238
C53D5.1	20.2547	19.8893
C54E10.6	87.0011	136.453
C54G4.5	42.2025	130.171
C55A6.10	12.2066	17.1836
C55A6.12	29.727	33.5192
C56A3.4	45.6766	20.6547
C56A3.6	41.745	79.5953
C56C10.10	36.3239	47.6539
C56G7.3	16.3615	29.9733
cab-1	1288.6	857.167
cah-3	582.702	581.083
cah-6	264.199	232.228
cal-2	441.366	853.648
cal-4	172.733	149.669
cal-8	58.1332	216.899
calf-1	104.323	125.303
calm-1	26.0037	49.6947
cam-1	35.6911	29.4444
cand-1	29.0855	36.3201
cap-1	193.622	236.927
cap-2	364.55	419.786
car-1	445.717	497.27
cars-1	96.7407	49.2873
cash-1	36.0131	52.26
casy-1	1791.77	1747.82
cav-1	73.513	86.7217
cccp-1	19.6154	44.7356
ccf-1	90.4358	98.1273
cco-1	1248.72	1375.57
cco-2	1220.72	1152.68
cct-1	186.481	200.544
cct-6	145.073	162.451
cct-7	166.088	175.591
CD4.3	31.9362	49.7409
cdc-14	37.1905	35.6699
cdc-42	271.865	276.016
cdf-1	10.4435	17.3675
cdgs-1	102.284	86.2702
cdh-1	16.5185	29.2592
cdk-1	34.4686	59.4692
cdk-12	11.4366	24.1289
cdk-5	43.9001	46.8185
cdk-7	18.7963	27.9885
cdk-9	27.2866	29.0458
cdka-1	536.98	654.02
cec-1	46.6959	94.5928
ced-12	15.6037	18.8597
ced-2	87.9249	96.874
ced-9	30.2321	49.8142
ceh-13	73.3724	94.6416
ceh-20	115.792	140.484
ceh-38	29.768	50.8446
ceh-44	52.4404	83.1305
cep-1	19.0128	19.9084
cey-1	1406.39	1515.72
cfim-2	28.8827	34.862
cgef-1	58.5273	85.63
cgh-1	219.109	353.745
cgp-1	54.511	38.5592
cha-1	172.835	286.078
chc-1	65.4835	87.4815
chk-1	10.2774	11.6948
chn-1	78.9595	78.9495
cic-1	14.7488	19.1185
cids-2	11.9494	24.1747
cit-1.2	22.6022	43.6904
cka-2	227.068	387.573
ckk-1	102.929	163.81
ckr-2	71.4693	71.1016
cks-1	121.198	161.51
clc-3	203.226	226.275
cle-1	223.742	396.9
clec-209	47.6171	22.051
clec-209	47.6171	22.051
clec-209	47.6171	22.051
clec-209	47.6171	22.051
clec-50	83.9951	65.4081
clec-63	305.454	102.978
clh-5	19.0555	25.4337
clic-1	202.087	265.92
clip-1	114.765	225.398
clk-1	47.6213	54.9837
clp-1	206.354	230.497
clp-4	216.062	214.29
cls-3	56.3724	91.2616
cmk-1	135.58	133.611
cnb-1	787.894	845.869
cni-1	24.7781	44.5924
cnp-2	14.0851	18.8636
cog-1	133.377	118.231
col-10	131.87	85.0721
col-106	1445.23	1328.29
col-107	49.2851	26.3113
col-117	131.78	62.0635
col-118	75.1854	67.956
col-119	5422.1	5030.19
col-125	63.6911	52.3083
col-130	113.588	69.1774
col-133	22.2403	45.3653
col-14	13.992	13.4234
col-144	119.958	87.0883
col-145	16.865	17.7313
col-146	21.9802	10.4841
col-147	46.7315	18.5396
col-154	32.7895	42.0303
col-155	48.7303	68.0047
col-159	280.02	386.753
col-160	852.867	1118.08
col-166	91.4505	70.4326
col-167	38.4604	30.1928
col-168	39.8867	29.7772
col-180	13.6457	10.8799
col-20	3537.77	3558.29
col-34	20.5468	24.3305
col-39	57.2592	35.3686
col-48	12.1053	12.2117
col-77	14.5459	29.6427
col-93	1126.46	1609.45
col-94	484.212	722.629
col-95	846.679	628.459
copb-1	82.6949	64.813
copb-2	56.2117	42.9108
copz-1	235.079	188.804
cpd-2	90.9106	105.446
cpf-2	54.1639	52.3228
cpg-2	483.107	372.203
cpg-8	347.159	171.401
cpi-2	1021.83	598.364
cpl-1	509.761	421.345
cpn-3	942.047	1255.29
cpna-5	171.621	211.214
cpr-1	743.49	187.741
cpr-6	226.396	170.919
cpx-1	2394.81	2871.28
cpz-1	352.273	328.53
crls-1	58.946	55.5685
csnk-1	106.423	155.319
cst-1	17.6943	29.8347
cst-2	20.7893	28.314
ctbp-1	33.4576	34.0392
ctl-2	52.4949	27.8372
ctn-1	87.8246	179.158
cul-2	30.418	41.3276
cul-3	43.9091	42.5988
cutl-15	37.6655	62.1511
cutl-19	119.943	131.718
cutl-26	24.4859	40.1571
cwn-1	81.3141	107.567
cyb-1	48.1992	79.4449
cyb-3	121.412	125.622
cyc-1	308.26	266.627
cyld-1	69.8081	119.84
cyn-13	163.053	177.053
cyn-3	1124.06	1140.75
cyn-7	2151.84	2245.31
cyp-31A2	20.6252	13.7589
cytb-5.2	333.49	292.831
cyy-1	36.5879	45.4509
D2007.2	69.2544	119.334
D2024.5	179.837	146.946
D2096.1	19.6818	24.1513
D2096.7	16.5812	36.2438
D2096.9	97.8229	43.9755
daf-1	19.7884	12.6711
daf-14	168.88	156.083
daf-19	22.3711	25.655
daf-21	972.934	1218.95
daf-28	115.897	15.4936
daf-3	31.6006	35.1552
daf-4	22.6473	29.1544
dbl-1	103.087	106.766
dbn-1	43.5573	42.4573
dcar-1	23.1881	11.9868
dct-1	303.457	187.331
ddx-17	338.019	271.257
deb-1	61.3937	39.9357
del-1	37.2935	53.9583
dep-1	50.5078	58.1184
dgk-1	45.9264	66.1346
dgk-2	43.2125	37.1323
dgn-1	14.7921	14.9167
DH11.5	457.491	801.036
dhhc-1	12.3895	13.5496
dhhc-2	20.2939	18.8323
dhs-17	365.111	527.037
dim-1	187.831	195.062
dma-1	10.0724	14.4235
dmsr-1	46.2303	47.1834
dmsr-5	78.7888	66.4593
dmsr-7	40.7881	58.8324
dnj-14	24.6113	37.83
dnj-16	50.6859	67.1164
dnj-19	138.659	193.058
dnj-23	72.7968	84.3862
dnj-8	19.6541	43.1584
dod-6	470.936	347.373
dop-1	85.1604	121.432
dop-5	42.0287	66.9315
dot-1.1	66.0554	62.3885
dpf-5	62.143	67.8494
dpy-18	30.2941	24.5585
dpy-23	145.292	170.448
dpy-28	13.575	16.4919
dpy-30	477.096	419.517
dpy-4	13.6452	26.148
drap-1	125.585	203.394
drn-1	488.877	772.174
drr-2	143.827	95.7838
dsh-1	25.512	55.7219
dyc-1	10.7497	24.699
dylt-1	198.716	156.593
dyn-1	170.258	195.04
dyrb-1	383.371	446.95
E01G6.2	77.5238	117.201
E02A10.3	79.1541	49.9925
eaf-1	22.4222	33.5379
eat-4	50.3679	21.5536
edc-3	11.7875	29.9158
eef-1A.2	733.407	533.487
eef-1B.1	1324.34	1113.61
eef-1G	1487.14	1294.15
eel-1	13.3619	20.7257
efk-1	42.3984	67.3158
efl-1	26.3221	26.9336
efn-2	26.2146	17.7815
efn-4	19.1465	29.7246
EGAP2.1	14.413	10.217
egl-13	49.8384	18.9899
egl-19	38.7161	28.2477
egl-21	2769.4	2349.4
egl-23	14.1766	15.2663
egl-3	1784.74	1893.66
egl-36	22.3695	25.0823
egl-4	216.139	216.267
egl-44	11.5882	10.0593
egl-45	37.7584	43.6136
ehs-1	40.0497	80.8529
eif-1	844.703	833.949
eif-1.A	331.333	373.304
ekl-4	16.6862	24.3878
ekl-5	11.9884	13.0427
elb-1	111.603	142.612
elks-1	47.1138	39.4297
elpc-2	13.6704	11.8014
elt-1	33.2203	20.9963
elt-6	19.3587	13.9337
emb-1	62.8253	62.6249
emb-27	14.0806	13.8809
emc-3	181.167	162.835
emr-1	112.254	82.8265
ensa-1	236.032	179.359
ent-1	46.897	38.2801
ent-2	77.2247	85.0431
enu-3.2	24.0201	14.2415
eor-1	17.6853	20.6911
epg-4	21.0572	30.1427
epn-1	123.958	108.765
ercc-1	116.652	144.213
eri-12	46.2009	93.2201
erp-1	225.152	355.631
ess-2	20.8572	20.8771
evl-20	26.2875	49.0917
exc-7	130.425	179.421
exc-9	813.379	140.433
exos-2	13.9382	17.583
F02A9.1	198.905	270.759
F02A9.4	59.8692	90.3361
F02D8.4	22.7305	33.6953
F02E9.10	16.6206	24.3143
F02E9.5	183.519	188.544
F07C3.2	372.803	658.285
F07E5.5	42.0933	22.6673
F08D12.12	125.104	131.043
F08F3.1	180.82	198.865
F08G12.8	188.605	117.122
F09C3.2	4262.48	5681.03
F09C8.2	10.8432	19.4158
F09E5.12	28.2936	18.9297
F09F7.7	82.0994	67.2892
F09G8.5	28.0417	55.0996
F09G8.7	121.784	128.09
F10C5.2	17.7345	29.1166
F10E7.11	14.1002	24.835
F10E7.2	22.2365	24.6473
F10E7.9	92.4022	116.213
F11A10.5	27.7578	34.2853
F11G11.5	33.9517	47.8697
F12F6.1	21.7056	40.4014
F13B12.6	15.6584	28.0451
F13C5.1	31.5458	34.4853
F13C5.2	33.7484	50.7123
F13D12.8	22.7258	24.3534
F13E6.1	371.825	412.796
F13E9.11	117.186	173.494
F13G3.10	176.848	159.323
F14B6.2	30.4666	16.8915
F15A8.6	28.6603	47.6827
F15D4.2	81.8653	59.3784
F15G9.1	250.091	223.785
F16A11.1	14.355	21.0551
F16C3.1	30.8713	19.3916
F17A9.2	15.5535	23.4078
F18A11.3	125.957	322.149
F18A11.5	71.5074	32.3958
F18G5.6	145.177	98.7662
F18H3.4	15.7636	25.4136
F19B10.1	31.4822	19.62
F19C6.2	33.6517	43.0946
F19C7.8	23.7025	15.8231
F19F10.3	78.7315	209.882
F20C5.6	12.0798	20.9769
F20D1.1	192.408	179.676
F20D1.3	220.76	273.779
F20H11.1	13.5724	17.3496
F21C10.3	50.5047	50.0606
F21D5.9	115.205	89.6912
F21F3.6	374.019	287.986
F22B5.4	137.175	87.2864
F22D6.2	1079.01	921.713
F22F4.4	274.785	560.337
F23A7.4	569.499	1306.55
F23B12.4	48.4474	39.2828
F25B5.3	223.534	315.725
F26A1.1	30.0172	22.0416
F26A10.1	2235.53	1009.64
F26E4.6	2407.74	2113.43
F26F12.3	170.387	217.457
F26F4.12	28.5561	28.744
F26F4.5	17.6038	16.1568
F28C1.3	32.6978	42.5679
F28C10.3	28.173	17.474
F28E10.1	118.413	153.908
F29A7.4	78.7714	55.4322
F29B9.8	41.7556	48.6344
F29C4.2	929.081	848.356
F30A10.3	124.234	182.006
F31C3.4	40.0562	31.9097
F31E3.2	10.652	43.6259
F32B5.6	118.681	108.943
F32B5.7	162.046	166.919
F32D1.5	248.398	214.658
F33D4.4	35.9952	39.5586
F33G12.6	49.1763	55.5524
F33H1.3	32.8726	44.7489
F33H2.3	119.305	113.241
F34H10.3	41.686	32.7451
F35E12.6	34.4434	58.1935
F35H12.1	37.5343	43.0792
F36A2.7	1010.77	1036
F36D4.5	72.1426	87.0396
F37A4.1	61.1046	60.3806
F37A8.5	438.649	703.397
F37C4.5	387.689	498.223
F37H8.5	51.9031	38.7571
F38B6.2	2458.08	3174.08
F38B6.6	12.4095	15.1581
F38E9.5	169.809	234.316
F39B2.8	111.419	131.095
F39G3.3	14.7896	14.0268
F39H12.3	150.622	152.023
F40A3.1	92.6073	48.9076
F40A3.4	14.0013	30.2761
F40E10.6	262.764	212.531
F40F8.5	22.5791	18.6624
F40H3.1	65.9338	82.2837
F41B4.1	32.3367	16.088
F41B4.3	23.8471	23.5596
F41C3.5	490.476	551.568
F41E7.7	285.507	82.1393
F41F3.3	76.0053	66.0782
F42A10.6	80.047	89.2939
F42A9.6	54.8912	37.2396
F42C5.9	74.6826	158.773
F42H10.3	18.5843	43.429
F43C9.2	1051.19	1092.75
F43G6.8	231.259	95.3877
F44E2.3	61.4222	55.9378
F44E2.7	12.1402	20.5056
F44E5.1	3035.94	2319.86
F44E5.5	506.29	461.796
F44G4.1	31.6579	30.8487
F44G4.6	42.6026	29.6365
F45D3.2	105.261	81.3763
F45E1.1	393.743	1060.5
F45H10.2	745.81	723.282
F46C5.2	60.3636	64.8648
F46C8.3	80.0915	49.6378
F46H5.2	29.2006	48.5846
F47B7.2	22.6011	19.2011
F47D12.3	698.124	1494.32
F47D12.6	71.4936	74.0868
F47F2.1	104.741	133.947
F47G4.4	103.789	85.329
F48D6.4	614.198	452.109
F49C12.11	1425.33	1294.11
F49E7.2	11.6151	19.8498
F49E8.6	21.8688	35.5961
F49H12.4	14.0776	37.8208
F52A8.3	370.706	646.718
F52A8.6	79.0801	54.6928
F52H2.1	11.5788	10.3837
F52H2.5	13.0778	20.3058
F53B2.8	43.4419	25.2304
F53C11.4	45.249	83.5763
F53E4.1	44.064	25.9876
F53F1.4	42.1861	136.85
F53F10.2	309.68	299.296
F53F4.12	13.1247	17.0961
F53F4.14	27.4474	27.1648
F54C8.4	114.326	109.842
F54C9.11	30.6951	59.8032
F54C9.7	38.4573	24.1923
F54D5.11	35.5779	59.7864
F54D5.5	10.0149	13.6819
F54E4.4	59.9569	96.6757
F54G2.1	109.723	161.186
F55A3.3	27.0518	51.614
F55C12.4	77.5551	136.404
F55C12.5	19.8353	36.3443
F56F10.2	71.4298	73.0808
F57B1.5	45.5301	47.3765
F57B7.2	237.075	339.196
F57G12.1	76.9055	96.1786
F58A3.4	53.6517	77.0212
F58B4.3	362.296	39.0027
F58H1.7	923.426	427.957
F59A3.4	34.9004	34.596
F59B8.1	94.6273	94.6228
F59D12.1	76.5213	101.746
F59E12.6	17.8324	30.1726
F59F4.2	2593.96	1865.54
far-1	9659.83	12188.7
farl-11	12.4715	31.5359
fbxa-150	10.799	15.1271
fbxa-167	15.9765	21.3337
fbxa-24	113.491	34.8272
fbxa-65	11.7663	18.3101
fbxc-50	15.2775	15.4459
fcho-1	23.0192	19.1008
feh-1	65.4722	104.758
fem-1	22.4339	18.8175
fem-2	30.7226	30.472
fic-1	13.401	13.3014
figl-1	19.5895	29.137
fipr-2	339.015	86.7543
fkb-2	889.416	940.263
fkh-7	56.8545	39.5265
fkh-9	213.607	83.8263
flap-1	10.2669	22.0858
flcn-1	147.974	134.749
flh-2	31.5889	32.8401
flp-10	1921.02	7090.28
flp-11	1055.33	992.359
flp-12	4399.02	6529.98
flp-13	39.5654	40.107
flp-14	536.107	279.711
flp-15	947.477	418.554
flp-19	698.592	191.775
flp-2	291.291	188.26
flp-21	396.754	138.782
flp-3	70.1265	10.3008
flp-32	1418.06	855.054
flp-4	789.343	1507.5
flp-5	1683.23	635.423
flp-8	250.671	127.7
flp-9	9193.65	7915.79
flr-2	161.311	487.203
fos-1	53.1576	60.5651
fox-1	20.1331	28.0569
fre-1	17.0597	17.9939
frm-1	157.196	177.237
frm-10	70.4338	143.911
frm-2	12.965	25.6914
frm-3	15.2451	15.1294
frm-4	28.0501	47.7958
frpr-16	17.6313	10.6735
ftt-2	2629.8	2639.38
fut-3	36.0246	42.4463
gab-1	126.34	162.012
gap-2	21.3933	25.8538
gar-2	236.097	299.975
gar-3	23.3023	38.7143
gcs-1	29.2223	36.5937
gcy-28	51.9918	93.3456
gdi-1	778.018	900.507
gei-15	35.7559	27.3001
gei-17	70.6417	75.089
gei-4	126.17	178.461
gem-4	29.7918	88.5423
gfl-1	15.9384	25.2143
glb-15	34.2749	74.9541
glb-18	337.594	391.637
glb-22	580.447	707.916
glb-23	24.903	32.3702
glb-9	33.0839	30.6792
gld-4	18.4173	29.012
gly-2	18.1523	41.3205
gly-20	12.5887	24.791
gna-2	20.31	40.4826
gnrr-1	35.7408	78.3218
gnrr-2	27.7574	40.7035
gnrr-4	84.9037	125.93
goa-1	604.768	750.463
gopc-1	334.226	346.372
gpb-1	937.764	912.672
gpb-2	92.375	121.599
gpc-1	59.5459	74.8184
gpc-2	6201.28	5805.91
gpcp-1	99.5987	95.4502
gpd-2	1330.56	1513.63
gpd-3	1324.92	1261.19
gpx-5	22.0984	34.8877
gras-1	31.8958	39.7679
grd-5	466.433	802.449
grk-1	47.1237	56.5158
gsa-1	68.1227	75.8382
gst-40	55.0662	32.7127
gstk-1	62.7067	27.8729
gsy-1	74.4147	77.3393
gtbp-1	91.8692	147.299
H04D03.3	16.6145	16.215
H04M03.12	20.219	21.6567
H05C05.2	26.1894	30.7807
H06I04.1	95.5839	140.565
H11E01.3	68.3384	101.753
H14E04.2	96.7818	113.024
H14E04.3	11.2118	16.1382
H18N23.2	27.9086	44.9564
H25P19.1	12.2248	16.9059
H28G03.2	43.1825	42.4048
H28O16.1	969.141	908.051
H36L18.2	1568.71	1542.35
ham-1	24.9845	18.1357
hcf-1	16.2712	26.234
hcp-3	31.1139	33.0543
hda-1	55.8475	71.8851
hda-3	27.1295	31.9494
hecd-1	30.6682	40.082
hecw-1	57.3771	95.9884
hex-1	312.489	498.868
hgap-1	27.9084	20.1659
hil-3	269.337	123.073
hil-7	850.414	536.615
him-1	15.2944	30.1731
hint-3	66.083	64.4805
hip-1	135.823	145.92
hipr-1	12.0367	20.8795
his-24	720.032	260.807
his-35	1339.35	1038.06
his-37	1806.29	1484.65
his-41	952.535	1092.43
his-62	27.3103	14.4325
his-68	22.0837	19.1445
his-71	859.818	689.579
his-72	2104.43	2091.16
hke-4.2	40.0623	29.7009
hlb-1	16.1879	18.3778
hlh-11	111.634	123.242
hlh-30	157.31	121.018
hmg-1.1	3238.52	2526.65
hmg-1.2	274.2	209.057
hmg-11	684.054	593.464
hmr-1	95.0131	93.3815
hot-2	133.38	126.554
hot-6	143.539	202.004
hot-7	28.5223	34.6898
hpl-2	68.2114	119.629
hpo-10	27.5044	35.1323
hpo-18	4730.34	4616.78
hpo-30	10.6509	37.2401
hrdl-1	74.3378	88.5892
hrp-1	259.248	275.793
hrp-2	322.048	187.585
hrpf-1	46.0014	43.0123
hsp-1	1365.2	1855.39
hsp-16.49	306.015	276.349
hsp-4	207.48	165.79
hsr-9	12.6774	27.8236
htz-1	601.52	484.385
hum-2	114.335	203.603
hum-5	23.4263	29.2395
icl-1	263.164	97.4797
ida-1	961.389	1452.95
idhg-1	118.115	139.599
ife-3	208.173	211.221
ifet-1	69.4776	115.047
iff-2	1277.63	725.445
iglr-1	17.4155	43.7761
iglr-2	20.3459	29.2523
ile-1	44.4277	45.1757
ima-1	29.239	22.9007
ima-3	99.699	87.7817
imb-2	37.4284	40.393
imb-3	83.0139	82.5093
immt-1	46.036	47.8122
ina-1	12.6555	17.4548
inos-1	244.499	203.358
ins-1	74.9439	34.6171
ins-17	3054.63	1070.05
insc-1	18.2879	37.315
inso-1	41.1119	63.3675
inx-1	93.2419	85.0507
inx-3	10.6873	16.2932
inx-7	10.9821	23.585
ipla-1	24.3666	36.4404
isp-1	402.584	372.892
istr-1	326.122	395.738
jamp-1	12.4493	16.4929
jip-1	148.863	189.541
jnk-1	300.095	469.612
K01A2.10	78.9828	80.9762
K01A2.5	27.6416	28.2001
K01G5.8	226.419	281.825
K02B7.3	154.208	129.806
K02E2.6	169.575	150.896
K02F2.5	485.662	738.826
K03A1.4	20.2517	20.3408
K03B4.2	317.825	177.826
K03B4.4	150.552	144.265
K03H1.7	46.3554	98.4497
K03H6.2	57.7002	43.9631
K04B12.2	10.3767	13.48
K05C4.5	20.4309	21.1465
K07C11.7	2039.79	2706.86
K07C11.8	45.5822	116.009
K07C5.4	192.009	150.858
K07F5.15	371.467	488.244
K07F5.15	371.467	481.132
K07F5.15	601.738	488.244
K07F5.15	601.738	481.132
K07H8.2	69.926	81.306
K08A2.1	56.8336	100.073
K08D12.3	933.202	610.002
K08E4.2	26.905	19.0696
K08E7.6	29.525	44.0144
K09D9.1	21.0295	17.8989
K09E4.4	844.49	1117.73
K09F6.6	12.0809	15.9517
K10B3.1	19.5217	92.1462
K10C9.1	293.067	217.53
K10G9.2	194.113	210.715
K11C4.2	45.01	79.3691
K11G12.6	12.2047	21.089
K11H12.7	657.174	517.124
kcnl-1	66.3959	94.3478
kcnl-2	50.3121	68.963
kel-3	12.3362	18.8947
kin-1	932.019	1132.28
kin-10	242.621	180.722
kin-19	272.66	232.541
kin-2	406.901	633.694
kin-29	32.8121	48.486
kin-3	190.283	138.371
kin-4	20.0889	31.2038
klc-2	177.04	231.04
klp-11	11.6525	15.8164
klp-20	17.2043	22.4098
klp-3	15.977	41.7314
klp-4	35.8981	49.8368
kpc-1	110.481	131.031
ksr-1	19.7988	31.6498
kup-1	26.1525	50.5653
lact-1	11.658	42.3984
lact-3	10.3899	13.7262
lag-1	35.8595	23.3666
ldb-1	41.7885	98.4096
lea-1	232.203	143.131
lec-1	1422.57	1233.26
lec-11	50.684	21.8666
lec-3	356.571	165.12
let-2	75.9459	80.3555
let-60	204.9	173.744
let-607	48.251	31.7732
let-70	1563.69	1351
let-711	21.8798	28.148
let-92	294.313	261.599
lev-10	56.9818	50.755
lev-11	1805.14	1460.03
lfi-1	44.055	120.511
lgc-30	37.2292	41.8219
lgc-31	293.477	490.092
lgc-37	47.1311	54.7528
lgc-39	13.6386	22.4688
lgc-4	11.5171	27.1278
lgg-1	3588.73	2932.27
lgg-2	1329.38	1303.54
lgg-3	83.4758	52.8838
lim-9	212.86	314.901
lin-10	64.3451	75.7313
lin-11	22.2682	26.7656
lin-14	82.5028	82.013
lin-2	58.721	93.0384
lin-23	45.5288	45.0665
lin-24	473.77	546.616
lin-37	20.8179	31.8685
lin-41	28.1963	19.8753
lin-45	23.2119	36.9569
lin-5	18.8187	32.9705
lin-52	131.463	106.475
lin-53	78.9836	92.7126
lin-59	34.9748	61.6983
lin-66	55.2497	66.5986
lir-1	36.5137	38.5037
lir-2	10.882	10.6227
lis-1	173.436	209.667
lmd-2	36.5548	33.1093
lmd-3	65.8069	93.9465
lnp-1	13.7862	11.0397
lntl-1	137.369	180.316
lpd-7	86.6139	73.3537
lpin-1	62.6939	63.427
lpl-1	54.089	91.0239
lron-10	269.002	178.236
lron-14	37.0875	53.4664
lron-3	234.856	227.232
lron-5	31.663	52.0363
lron-7	16.6254	16.3289
lrr-1	10.8329	11.857
lst-2	14.7831	21.022
lst-6	14.6255	24.1331
lsy-22	88.2456	83.0296
lurp-1	51.4262	84.629
M01A8.1	46.064	11.7783
M01B12.4	93.7588	107.229
M01H9.3	581.315	301.29
M02B1.2	28.5614	34.3251
M02B1.3	113.709	113.028
M02E1.1	22.2194	39.6205
M03C11.1	47.0267	41.7582
M03E7.1	69.9825	88.5387
M03F8.6	80.6163	60.8123
M04F3.4	157.903	211.055
M05D6.2	17.7248	31.9905
M106.3	54.9635	73.6373
M117.1	120.187	138.148
M163.1	68.8954	36.371
M176.11	32.9169	27.7195
M176.5	91.2425	103.082
M60.2	49.6444	12.3861
M60.6	43.9216	26.8435
mab-5	93.968	194.596
madd-4	211.1	400.236
madf-4	13.8318	12.8976
magi-1	54.8665	76.0391
magu-3	38.5897	39.6674
mai-1	293.857	212.229
mak-1	202.734	251.112
mau-8	13.33	38.5389
max-1	13.4882	29.8789
mbk-2	193.958	203.061
mcm-3	14.4934	24.5018
mcm-4	223.137	26.4358
mcp-1	56.3711	70.097
mcu-1	62.0408	113.674
mdt-26	17.8885	35.5768
mdt-6	25.7944	32.0955
mec-12	1010.68	1652.01
mec-2	69.7638	52.4025
mec-7	158.402	198.001
mec-8	15.9673	33.5007
mef-2	134.311	208.19
mei-2	51.7392	62.7065
mek-1	42.8767	36.8866
mel-11	17.2822	36.2818
memb-2	23.0742	47.9684
men-1	88.4694	101.399
mep-1	60.741	91.7216
mes-3	12.6737	29.6793
mev-1	330.147	280.503
mex-5	71.6959	96.4436
mfb-1	56.7359	45.0099
mics-1	30.8663	46.6737
mif-3	37.9905	28.6761
mig-1	168.025	201.606
mig-10	63.9615	59.2286
mig-13	51.4376	25.3662
mig-15	43.3648	80.6335
mig-2	33.3931	49.5212
mig-22	29.5638	20.5092
mig-5	14.1918	19.7251
mig-6	90.303	97.4252
miro-1	18.293	18.8445
mlc-1	1110.72	833.151
mlc-3	2132.15	1568.91
mlc-4	420.968	464.204
mlh-1	15.6126	11.8118
mlp-1	525.676	522.47
mmcm-1	73.5419	86.5899
mnr-1	24.7582	22.284
moc-2	52.2555	41.3862
mom-5	77.4723	88.7802
mpk-1	101.544	124.587
mpz-1	57.3168	56.8169
mrg-1	90.7534	92.4861
msp-19	34.8151	33.8783
msp-31	33.4059	30.7772
msp-50	20.0597	24.9588
mtl-1	515.785	23
mtl-2	1766.77	1004.3
mtm-3	74.8993	112.27
mtm-9	36.7617	36.8983
mup-2	416.609	358.221
mus-81	18.7136	38.6161
mvk-1	294.669	313.89
nab-1	39.7409	69.1378
nck-1	97.9506	71.0471
ncx-4	120.079	128.624
ndk-1	3228.48	2793.42
nduf-5	345.814	367.001
nduf-6	191.173	268.836
ndx-1	131.4	147.645
ndx-4	134.129	118.056
nep-11	86.9141	99.1155
nep-21	108.842	238.889
nex-1	518.174	489.355
nhl-3	40.698	30.6009
nhr-1	157.668	156.316
nhr-3	21.3298	22.3061
nhr-40	102.459	150.052
nhr-46	73.6322	52.8237
nhr-47	19.1652	17.312
nhr-48	17.5562	29.2916
nhr-49	114.252	109.187
nhr-50	35.2117	10.581
nhr-71	57.0081	47.4797
nhx-5	23.8	27.1494
nipa-1	19.9289	18.142
nipi-3	105.217	142.909
nlg-1	25.6353	33.9114
nlp-1	328.542	221.975
nlp-11	3781.84	2559.58
nlp-12	946.936	236.989
nlp-13	1454.64	1942.19
nlp-14	427.715	322.646
nlp-18	4197.95	1315.92
nlp-21	6671.44	7830.84
nlp-33	464.344	326.025
nlp-35	328.749	54.475
nlp-42	1956.08	170.443
nlp-6	758.536	878.364
nlp-9	8736.68	8799.63
nlr-1	22.1453	44.7642
nmtn-1	29.9776	35.3766
nmy-2	11.1306	32.1559
nnt-1	40.3555	31.6986
noca-1	40.3658	75.4652
nola-3	1153.53	563.162
npp-4	30.1849	30.5606
npp-8	21.1579	25.9262
npr-16	35.3261	35.2858
npr-25	27.0345	12.8614
npr-29	48.8264	49.3027
npr-33	20.6835	14.222
npr-7	24.9375	22.2624
nra-1	296.057	450.522
nrx-1	351.091	359.919
nsf-1	125.489	191.586
nsy-1	14.2469	32.4152
ntl-2	146.366	146.289
nubp-1	83.7803	87.9073
nud-2	44.7749	85.8985
nurf-1	129.531	142.353
obr-2	17.8305	13.9698
obr-3	36.6667	55.0031
octr-1	41.8834	34.6023
odc-1	33.164	25.7847
ogt-1	42.7775	72.4836
oig-1	67.0251	48.266
olrn-1	93.6091	96.376
orc-4	15.8257	14.7077
osm-11	549.14	533.508
osta-2	53.8607	59.4148
osta-3	42.8564	47.9394
oxi-1	17.7567	24.8847
paa-1	171.133	206.525
pab-1	945.957	890.066
pab-2	42.6254	76.928
pabp-2	125.038	114.031
paf-2	52.2504	40.3023
pak-2	10.2563	18.5922
pan-1	105.192	61.0528
panl-3	17.4826	24.1396
paqr-1	38.8905	44.9573
par-1	149.543	221.522
par-5	2509.73	2428.58
pat-12	52.4135	83.9819
pat-4	40.01	42.2885
pat-9	16.0711	17.6031
patr-1	42.1669	50.7373
pbrm-1	28.6614	48.8547
pcf-11	43.8752	55.9187
pck-1	1059.49	1152.24
pcn-1	133.929	137.575
pct-1	59.1702	93.1368
pdcd-2	55.5492	125.23
pdcd-2	55.5492	33.6444
pdcd-2	165.716	125.23
pdcd-2	165.716	33.6444
pde-4	186.149	229.693
pdf-1	1352.78	1052.72
pdfr-1	92.6691	135.737
pdhk-2	70.4982	75.6174
pdi-2	352.449	341.021
pdk-1	25.2782	10.0987
pdl-1	204.522	169.468
pes-7	10.4854	15.475
pfk-1.1	299.39	352.349
pfn-1	540.414	641.863
pgal-1	2374.43	2401.08
pgam-5	63.8887	53.3251
pghm-1	2137.63	1668.26
pha-4	10.4263	33.2212
phip-1	149.597	95.3942
piga-1	11.683	10.0965
pisy-1	145.94	144.78
pitp-1	44.3088	44.2418
pitr-1	182.058	260.133
pkc-1	93.3232	150.718
pkc-2	74.8524	87.3334
pkc-3	24.791	21.6031
pkg-2	313.125	363.206
plc-1	17.8654	29.9261
plk-1	23.8943	39.4661
plk-2	17.9431	20.4674
pll-1	69.8451	76.3439
pmk-2	41.0123	51.9067
pmp-3	80.5178	95.3031
pmr-1	29.8671	26.3539
poml-2	25.5535	43.4285
pos-1	219.095	194.531
ppfr-2	16.1044	35.6871
pps-1	29.4333	33.6676
pptr-2	78.3613	107.748
pqn-35	40.1146	13.045
pqn-39	25.0305	34.3146
pqn-41	85.0087	102.933
pqn-44	509.117	771.524
pqn-52	552.117	756.41
pqn-53	367.685	309.921
pqn-59	213.563	259.944
pqn-70	272.153	383.574
pqn-87	70.0651	91.8606
pqn-94	48.9429	30.3124
pqn-96	45.7916	31.9381
prmt-1	291.628	254.573
prx-14	27.4871	29.4333
pry-1	41.5017	60.8477
psr-1	32.7454	24.3306
pst-1	10.8495	12.9419
ptc-1	98.8439	118.013
ptl-1	143.593	101.677
ptp-1	63.4914	74.004
ptp-3	72.7356	87.2303
ptr-2	21.7928	21.4219
pud-3	256.811	91.0321
puf-9	21.9887	15.376
pyp-1	253.504	199.639
qars-1	39.3273	52.8674
R02D3.3	14.9075	51.6262
R02D5.1	35.2963	58.1691
R02F2.1	717.556	496.541
R04E5.8	99.1807	89.9124
R04E5.9	43.1712	32.6161
R04F11.2	1603.33	1469.34
R05D7.1	73.7135	16.6788
R05D7.3	41.892	57.0377
R05F9.9	11.257	18.1121
R05G6.10	18.4811	32.6678
R05H5.5	10.9415	19.2728
R06C1.4	1650.2	2121.85
R06C1.6	77.4434	102.633
R06F6.12	14.2569	25.0634
R07G3.8	29.547	62.3092
R08D7.5	82.938	69.4023
R09F10.3	13.2547	13.8483
R09F10.5	66.1146	76.0809
R102.2	79.0589	129.262
R10E11.5	174.752	463.565
R10E12.2	37.367	25.5118
R119.5	22.6618	17.2672
R11H6.2	49.1619	60.5357
R11H6.4	121.173	63.6372
R11H6.5	11.7299	27.6867
R12E2.14	22.6185	47.5111
R12E2.15	160.99	48.6033
R12E2.7	40.8038	51.6232
R13H4.2	156.998	138.333
R13H4.5	122.976	134.681
R13H7.2	11.2061	13.1244
R144.3	13.9677	24.9258
R151.2	107.669	122.914
R166.3	54.9136	75.2459
R53.4	1340.83	1197.28
R74.8	67.2045	82.8654
R90.1	53.7613	109.181
rab-1	764.302	584.8
rab-10	173.358	228.038
rab-11.1	749.169	613.723
rab-14	256.473	193.63
rab-19	284.349	290.285
rab-21	31.261	44.7863
rab-3	771.472	1022.06
rab-37	129.408	143.346
rab-5	337.808	306.412
rab-6.2	219.709	177.817
rabn-5	16.4153	31.4791
rack-1	2428.49	1544.63
ram-2	51.0095	35.4587
ran-1	570.581	559.874
ras-1	68.3124	80.9604
rbc-1	12.6716	20.8454
rbg-1	23.2964	21.4898
rbg-3	18.423	27.5521
rbx-2	30.5016	36.9701
rcor-1	13.3663	18.6445
rde-11	14.554	17.9823
rer-1	117.049	90.857
ret-1	688.11	670.258
rfc-2	51.1242	25.9407
rgef-1	56.8932	74.8353
rgs-1	85.2322	72.6303
rgs-6	74.6208	71.6212
rgs-7	15.0522	13.2786
rhgf-1	32.5266	73.5989
rhgf-2	41.1142	46.9848
ric-19	22.9105	50.0967
ric-3	14.1026	50.3053
ric-4	1492.36	2253.37
ric-8	19.9654	54.0333
rig-3	57.7665	65.3465
rig-6	59.8146	98.3098
rin-1	23.1212	18.8286
riok-2	43.2229	34.4251
rla-0	4324.41	3679.03
rla-1	5701.55	4394.76
rlbp-1	13.6081	22.6323
rme-1	226.207	267.062
rme-4	24.748	33.417
rnh-1.3	40.5198	47.3518
rnh-2	16.2814	20.5291
rnp-1	26.9144	61.4026
rnp-7	50.6685	79.5609
rpa-4	14.2419	25.0945
rpb-11	49.8935	93.6769
rpn-10	107.409	142.224
rpt-1	108.35	144.704
rpt-6	136.028	162.526
rrc-1	15.0878	35.7556
rsbp-1	75.4075	201.622
rsd-6	13.1466	23.3869
rsf-1	17.7167	26.9834
rskd-1	84.1894	168.285
rskn-1	134.653	270.018
rskn-2	37.7357	107.276
rsp-2	211.852	164.832
rsp-3	314.52	278.478
rsp-5	155.987	140.115
rsp-8	76.4873	71.7404
sad-1	94.8205	148.909
saeg-1	91.6391	137.085
samp-1	18.2456	20.2779
sams-3	138.638	64.0604
sams-4	271.412	87.3638
saps-1	36.0451	25.1519
sar-1	204.35	141.841
sax-1	26.3241	36.6968
sax-3	27.0187	39.3777
sax-7	63.6222	126.62
sbt-1	4963.42	4464.25
scbp-2	18.5837	19.9562
scl-2	112.832	25.0629
scrm-1	69.2481	52.0813
scrm-2	59.507	103.015
scrm-3	65.9031	51.9028
sdha-1	82.3141	78.1026
sdhd-1	317.35	408.861
sdn-1	155.632	111.968
sea-2	56.1341	80.8901
sec-12	40.1277	37.9481
sec-23	82.7059	57.6907
sec-31	19.6363	28.3949
sek-1	76.2026	69.1052
sel-13	14.4667	27.2685
sem-5	67.2952	46.3831
ser-4	38.6437	15.8008
set-16	11.486	15.0944
set-3	15.3679	22.9798
sfrp-1	93.2976	75.1676
sft-4	118.187	90.082
sftd-3	24.5023	27.0608
sfxn-2	20.0961	23.0049
shc-2	10.3523	20.775
shw-1	56.3558	115.219
sid-5	188.39	130.272
sip-1	1464.58	1194.07
sipa-1	97.942	119.159
sir-2.1	11.2711	21.7341
sir-2.4	19.3276	22.1718
ska-1	10.2952	20.4999
ska-3	28.4005	30.5898
skat-1	15.7707	15.9741
skn-1	65.8834	70.3026
skr-20	67.6733	63.1089
skr-21	12.0198	10.357
slc-17.1	68.9495	80.047
slc-17.4	14.0118	36.6174
slc-17.7	26.7125	16.5071
sli-1	15.4559	23.7417
slo-2	81.811	144.989
slx-1	18.535	18.4005
smg-4	20.097	32.7673
smk-1	39.9535	61.0468
smo-1	651.367	718.632
smp-1	45.7975	62.8809
sms-1	98.3282	104.525
sms-2	32.7306	34.0127
sms-3	33.5607	26.7956
smu-2	23.7339	28.16
sna-1	54.5805	56.7918
snap-1	251.132	356.104
snap-29	82.9529	104.466
snb-1	2674.6	2806.14
snet-1	406.247	294.575
snf-1	11.8772	11.872
snf-11	17.1128	21.4371
snfc-5	31.9603	48.6829
sng-1	299.824	320.626
snn-1	130.821	136.969
snpn-1	54.276	71.5376
snr-2	304.468	319.125
snr-4	339.892	296.149
snt-1	217.77	463.247
snt-4	1304.9	1260.91
snx-14	25.492	31.8707
snx-17	21.8848	53.0301
soap-1	40.1756	65.4915
soc-2	60.1984	77.939
sodh-1	700.767	65.6491
sol-1	14.8817	19.4825
sox-2	91.2864	36.1267
spc-1	144.869	251.879
spe-15	34.1225	61.994
spe-39	17.3999	27.3267
spk-1	114.111	170.721
spp-14	996.529	1456.96
sptf-1	16.3835	14.9213
sqd-1	341.381	277.26
sqst-1	163.134	201.797
sqt-3	22.0133	30.5327
sqv-5	11.6993	20.7473
sqv-7	17.2011	26.5231
sqv-8	44.5316	46.6651
ssu-2	27.5386	22.1022
stam-1	47.2812	50.3212
stau-1	10.5739	19.0581
stim-1	12.1029	16.4377
stn-1	66.1415	95.5441
sto-1	17.383	11.5759
sto-4	127.615	86.9012
sto-5	44.1068	43.6016
sto-6	215.851	253.637
sue-1	102.471	125.148
sup-1	1247.61	838.923
sup-17	24.6272	35.2852
sup-36	231.842	113.444
svh-2	11.3167	26.3346
svop-1	48.1113	80.1867
swan-1	32.9424	23.7631
swan-2	18.494	20.5083
swsn-1	27.6837	41.1373
swsn-9	16.7801	26.2489
syd-1	23.6051	33.0317
syd-9	35.0202	87.3902
syg-1	67.5525	108.518
szy-20	11.241	18.8801
T01D1.4	35.7535	120.219
T01D3.1	125.704	160.374
T01G1.2	259.862	218.068
T01G9.2	78.6932	70.7464
T02E9.5	193.688	157.519
T04C12.3	1661.79	486.772
T04C9.1	226.094	289.471
T04D3.5	28.4347	41.3152
T04F8.2	10.8089	12.3275
T04F8.3	35.9007	43.2009
T04F8.6	18.7762	45.9081
T04H1.2	76.9418	111.097
T05A8.3	3307.25	6600.84
T05B11.1	25.4841	22.6846
T05C1.2	82.5539	85.7621
T06A10.2	532.211	358.253
T06F4.1	124.512	126.985
T07A9.10	12.3145	24.3172
T07D1.2	54.8621	55.214
T07F12.4	309.962	359.858
T08B2.5	35.6851	49.3482
T08G11.4	10.2047	18.298
T09A5.7	37.2534	87.1984
T09B4.5	11.3226	33.6947
T09B9.4	15.057	11.715
T10B10.3	18.7499	15.8332
T10B5.4	206.135	260.096
T10C6.5	130.887	129.346
T10D4.6	13.9907	14.6974
T11B7.2	473.754	28.7656
T13C2.6	56.7366	57.1468
T14B4.8	38.7169	76.0517
T19C4.5	156.603	247.453
T19D12.6	17.436	36.0724
T19H5.4	117.633	115.182
T20B12.7	291.26	243.066
T20D3.8	19.6647	15.6461
T20F10.5	31.6034	27.8605
T20F5.6	23.0581	31.6768
T20F5.7	37.7006	36.5939
T21C9.4	59.9076	65.2955
T21H3.1	557.75	333.409
T22E5.1	2107.72	1881.6
T22F3.3	306.268	344.741
T22F7.1	19.9269	12.6731
T23B3.2	148.892	130.075
T23C6.4	34.8625	87.5544
T23F2.3	1427.92	1172.19
T23F2.5	408.682	695.228
T23F4.2	12.411	16.8559
T23G4.2	17.2138	33.9141
T23G5.2	41.473	39.8482
T23G7.2	15.3665	17.1881
T24B8.3	1217.16	1024.65
T24B8.4	13.509	11.7002
T24D1.2	12.2414	27.9373
T24G10.2	46.6931	39.1614
T24H10.1	43.9931	47.5401
T24H10.4	97.7397	126.567
T24H7.2	11.0792	17.7187
T25B9.3	52.5762	57.9892
T25D10.4	69.1974	11.7188
T26A8.4	36.674	36.7258
T27A10.2	39.6847	18.1691
T27C4.1	3676.23	3901.27
T27E4.1	105.516	86.555
T27E4.7	291.469	170.742
T28B11.1	145.591	175.535
T28C12.4	24.1004	52.6329
T28D6.4	14.6826	24.4444
T28D9.1	815.128	779.905
T28F4.5	2056.33	1576.28
T28H10.3	18.4197	15.5456
tads-1	40.678	55.0651
tag-153	23.5833	29.9564
tag-180	65.7892	91.7805
tag-232	40.0275	69.0897
tag-260	42.6993	14.1775
tag-261	175.995	111.667
tag-296	18.5842	26.3769
tag-30	16.1702	22.6416
tag-304	59.7234	56.2158
tag-321	36.9314	42.3662
tag-340	23.0349	20.0134
tag-349	36.3792	68.2985
tag-68	105.979	137.786
tag-80	21.5007	28.068
tam-1	25.3974	36.792
tat-4	87.0209	58.8943
tba-1	1112.26	1679.19
tba-2	1519.21	1819.58
tbb-1	498.008	573.636
tbb-2	2043.58	2958.23
tbc-12	15.8325	28.49
tbc-16	17.0028	32.0191
tbc-18	15.6585	31.1553
tbc-7	44.0039	58.8748
tbc-8	35.1035	41.143
tbca-1	136.976	144.546
tbce-1	13.3276	20.4308
tbh-1	89.5151	151.672
tcc-1	43.5774	87.503
tct-1	2578.52	1980.28
tdp-1	28.1737	35.9668
thoc-3	15.4517	23.0861
tiam-1	10.4114	36.9338
tig-2	88.0114	104.751
tir-1	24.4402	33.2346
tlf-1	12.5381	20.9017
tlk-1	39.4624	64.0167
tln-1	75.9046	89.5024
tlp-1	108.883	134.672
tmbi-4	140.493	99.8198
tnt-3	16.9779	39.9149
toe-4	127.096	94.1569
tom-1	42.0482	151.795
tos-1	1034.05	895.318
tpa-1	59.8053	87.1917
tpi-1	686.323	850.043
tpra-1	390.525	219.29
tpst-1	50.0827	51.2268
tpxl-1	17.5544	34.5514
tram-1	136.048	103.192
trap-3	354.517	287.038
trcs-2	15.9091	18.7487
trp-1	21.711	37.4648
trpp-11	16.9852	26.3241
trpp-4	34.5049	54.3181
trx-3	14.6015	11.9026
trx-4	267.298	180.759
trxr-1	44.3323	54.2717
trxr-2	12.2546	10.8821
tsp-12	47.2318	41.1782
tsp-7	530.126	606.485
tth-1	157.408	100.976
ttr-17	91.8549	43.3602
ttr-52	68.7171	126.614
ttx-7	118.944	141.492
twk-13	55.9699	104.195
twk-29	132.514	128.93
twk-30	76.2272	149.811
twk-35	100.944	166.322
twk-40	89.7369	126.795
twk-46	58.8871	107.548
twk-49	612.553	874.354
uaf-1	205.816	118.349
uaf-2	120.798	82.9274
uba-1	69.5054	97.2101
ubc-1	379.485	478.904
ubc-25	134.708	114.539
ubc-3	433.368	426.008
ubc-9	171.196	227.214
ubh-1	191.017	337.468
ubq-1	652.253	900.238
ubq-2	6652.15	4646.03
ubql-1	136.252	140.662
ubxn-1	100.451	76.8054
ubxn-2	63.5734	62.0014
uev-1	441.907	273.925
ugt-50	115.213	65.2217
umps-1	32.3282	36.9869
unc-1	481.342	489.558
unc-10	12.1619	31.8634
unc-104	26.4925	108.856
unc-108	1441.15	1506.06
unc-11	244.046	335.956
unc-112	22.1278	69.9839
unc-115	204.846	282.017
unc-116	128.104	187.791
unc-129	163.078	323.179
unc-13	49.4833	132.316
unc-14	202.611	327.188
unc-15	249.964	222.473
unc-16	119.961	139.79
unc-17	395.229	573.002
unc-18	280.522	439.2
unc-2	50.6278	112.667
unc-26	25.496	43.5221
unc-3	70.6339	118.414
unc-32	207.965	245.492
unc-37	38.8228	57.7489
unc-38	14.6917	49.7538
unc-4	217.987	274.48
unc-41	20.0023	80.1087
unc-43	322.562	349.237
unc-44	118.201	237.068
unc-49	259.809	490.235
unc-5	35.164	42.8797
unc-58	58.2006	57.1063
unc-6	45.2847	113.44
unc-60	737.469	895.215
unc-62	212.776	186.333
unc-64	582.832	826.012
unc-69	419.232	484.122
unc-70	105.423	212.477
unc-76	250.064	314.005
unc-77	39.6073	45.5507
unc-80	17.3545	46.2102
unc-82	13.2981	35.0136
unc-83	27.3166	46.7647
unc-9	146.374	227.596
usp-5	16.358	43.7678
vab-1	58.1386	60.1755
vab-10	13.0126	23.7088
vacl-14	11.1299	13.8813
vbh-1	101.163	108.712
vha-13	384.205	419.456
vha-14	476.684	445.59
vha-2	1626.08	1486.27
vig-1	1126.96	908.593
viln-1	13.7036	31.4085
vpr-1	170.233	191.983
vps-20	87.714	110.306
vps-22	114.679	141.343
vps-32.1	396.239	350.048
vps-35	15.4542	32.7176
W02B12.10	23.009	32.0049
W02B12.11	20.3557	33.2293
W02C12.2	256.473	436.013
W02D9.2	68.0255	67.1253
W03G11.4	123.094	192.639
W04A8.4	32.647	15.6129
W04B5.3	10.3255	10.3902
W04C9.2	193.336	235.416
W05B5.1	488.078	681.949
W05H12.1	246.104	533.549
W05H12.2	19.0351	40.1486
W06H8.5	129.931	144.975
W07E11.1	41.4406	57.1498
W07G4.5	48.8255	46.9433
W08E3.2	38.7685	69.0652
W08F4.3	126.395	113.565
W09C5.7	13.1607	32.623
W09D10.1	49.5005	48.1205
W09G12.9	58.3981	17.4324
wdr-20	16.6118	33.8528
wdr-5.1	33.9209	45.5209
wrk-1	34.7533	40.8107
wsp-1	18.8426	22.0788
wwp-1	86.4115	121.472
xbp-1	912.642	1105.26
xbx-6	189.846	269.873
xpo-1	73.2649	82.9144
Y102E9.2	46.403	36.757
Y105C5A.12	141.053	24.2976
Y105E8B.7	25.9443	14.0474
Y106G6H.5	25.424	32.545
Y110A7A.7	41.7577	38.669
Y113G7A.15	133.992	73.3806
Y116F11A.6	93.3853	81.6194
Y119C1B.3	201.226	313.604
Y119C1B.6	160.673	49.355
Y119D3B.21	1311.44	1961.4
Y12A6A.2	1611.03	895.955
Y14H12B.1	61.8194	77.6162
Y17D7B.4	69.462	43.9986
Y17G7B.17	106.325	105.272
Y17G9B.5	10.113	21.2127
Y17G9B.8	33.3745	32.9488
Y18H1A.2	48.7492	43.7384
Y18H1A.4	87.333	89.2409
Y20F4.4	33.8329	31.7109
Y24F12A.1	10.6052	19.4204
Y25C1A.7	63.9065	44.295
Y34B4A.4	11.727	26.7169
Y34B4A.7	13.446	25.2076
Y37A1A.3	10.0648	13.2477
Y37D8A.17	21.7271	20.715
Y37D8A.2	25.6458	35.3552
Y37D8A.21	13.3574	38.0961
Y37D8A.4	52.0355	63.4066
Y37D8A.6	92.3076	80.9367
Y37E11B.1	12.0795	10.9839
Y37E3.8	8125.15	6505.08
Y38E10A.14	21.813	47.3692
Y38E10A.24	457.893	459.898
Y39A1A.24	94.2196	135.58
Y39A1C.1	170.933	165.377
Y39F10A.1	53.448	69.2806
Y39G10AR.9	35.2213	29.4714
Y40B10A.9	42.3988	24.2803
Y40C5A.4	90.0184	59.6694
Y41E3.1	25.6519	41.908
Y42H9AR.1	34.5018	24.6911
Y43E12A.2	92.1776	80.7795
Y43F8B.2	2101.34	2137.23
Y43F8C.11	68.8584	22.1622
Y44A6D.2	7154.1	7778.34
Y45G12B.3	24.7538	29.9909
Y45G5AM.9	40.2313	29.369
Y48C3A.5	59.3323	17.4501
Y48E1B.3	82.4302	69.7279
Y48E1C.1	16.9049	16.1655
Y48G1C.6	30.08	10.7083
Y48G1C.9	146.748	99.183
Y49G5B.1	43.4998	37.3543
Y51H4A.1	10.7459	15.5151
Y51H7BR.4	20.1839	31.9935
Y52B11A.3	11.5271	18.3168
Y53F4B.12	114.297	120.627
Y53G8AM.8	23.0982	16.8271
Y53H1B.2	56.4117	36.4661
Y54E2A.10	197.673	215.794
Y54G11A.11	409.837	416.976
Y54G2A.26	366.37	419.557
Y55B1AL.2	208.233	343.13
Y57A10A.13	19.6828	20.3453
Y57E12AL.1	101.069	98.3071
Y57E12AM.1	1104.8	497.067
Y57G11C.22	27.2323	67.411
Y57G11C.36	28.1437	26.0277
Y57G11C.9	83.0376	77.1373
Y59A8B.10	84.4085	93.6301
Y59A8B.8	104.977	132.716
Y61A9LA.1	21.6413	27.6868
Y61A9LA.3	43.5977	49.5845
Y64G10A.6	73.6581	93.0737
Y65B4A.1	11.3736	19.9751
Y66A7A.7	27.9339	11.5414
Y66D12A.24	34.0072	16.1208
Y66D12A.8	275.464	40.639
Y67A10A.7	63.307	105.063
Y67D8B.4	148.529	261.988
Y67D8B.4	148.529	104.149
Y67D8B.4	327.714	261.988
Y67D8B.4	327.714	104.149
Y67H2A.2	289.259	27.3057
Y67H2A.5	1148.61	1093.49
Y69A2AR.1	86.719	133.709
Y69A2AR.16	11.0748	18.7291
Y69A2AR.28	44.9177	48.6138
Y69A2AR.31	13.5059	19.868
Y71F9AL.12	15.445	33.2949
Y71F9AL.9	188.439	225.009
Y71G12B.23	43.5701	39.0737
Y71H10B.1	110.88	116.537
Y71H2AM.1	22.7142	17.0923
Y71H2AM.10	37.6769	53.0577
Y71H2AM.4	476.43	362.395
Y71H2AM.5	1611.34	1762.59
Y71H2B.4	269.815	136.418
Y73B3A.18	485.225	332.935
Y74C10AL.2	91.9894	112.975
Y75B12B.1	87.3448	86.9526
Y75B8A.13	12.3416	13.5535
Y75B8A.24	23.1282	34.3188
Y7A9D.1	32.7145	42.9687
Y92H12BR.2	69.6051	77.4566
Y92H12BR.3	57.1554	54.4997
Y97E10AR.1	48.2035	35.2043
Y97E10AR.6	115.486	134.496
Y9C12A.1	16.8328	28.1753
yop-1	231.978	185.303
ZC123.4	38.0775	30.6427
ZC155.2	51.8062	90.9594
ZC434.7	20.8814	90.8321
ZC443.3	158.896	229.512
ZC449.4	530.137	188.8
ZC487.1	15.7587	21.7464
ZC581.9	17.8631	12.245
zen-4	15.3427	15.7152
zer-1	116.9	155.077
zfh-2	90.2639	63.9854
zfp-1	21.875	21.8241
zfp-1	21.875	84.7327
zfp-1	66.6422	21.8241
zfp-1	66.6422	84.7327
zfp-3	35.4875	31.1716
zig-5	231.436	85.6854
zip-2	1090.53	1334.45
zip-4	34.6935	44.9918
zip-8	87.762	38.767
ZK1010.2	14.5587	28.2259
ZK1073.1	298.789	251.633
ZK1127.3	20.0881	41.322
ZK1128.7	35.2827	33.1645
ZK1307.9	18.0305	30.8402
ZK131.11	116.659	81.3244
ZK154.6	61.5903	179.041
ZK177.4	10.9042	13.2063
ZK177.8	20.1087	29.1843
ZK180.3	10.4012	15.4907
ZK265.7	24.0431	29.9077
ZK287.1	63.4463	123.68
ZK370.4	70.9711	101.354
ZK418.9	50.8535	87.4048
ZK470.2	1300.43	1121.5
ZK484.3	25.1138	46.2829
ZK484.4	12.8893	17.6315
ZK550.6	106.348	46.6705
ZK643.5	47.6336	64.9832
ZK688.9	17.9763	23.6323
ZK757.2	108.006	86.8139
ZK813.1	1167.55	1067.09
ZK829.7	213.354	302.718
ZK858.6	58.7112	31.564
ZK899.1	46.6571	26.5347
ZK909.3	36.1358	53.1596
ZK973.11	27.9989	56.1259
ZK973.9	34.5933	35.1525
ztf-26	202.01	191.145
ztf-4	48.9078	39.9959
ztf-6	98.9968	66.1585
ztf-7	256.836	137.75
zwl-1	39.2494	23.1129
zyg-11	20.8568	25.9582
zyg-9	29.931	55.043
zyx-1	2672.04	3568.28

## Sheet: WT vs. acr-2(gf) DESEQ2 p<0.05
Gene	Mean Count	log2(Fold Change)	SE	Wald Stat	p-value	adj. p-value	Concise Description
ins-25	1475.39	7.12298	0.469571	15.1691	5.66406e-52	6.97925e-48	ins-25 encodes predicted type-alpha insulin-like molecule that lacks a C peptide domain and does not have an A6\/A11 disulfide bond.
K03B4.4	13683.5	4.77786	0.393027	12.1566	5.29287e-34	3.26094e-30	N.A.
C05E7.3	2532.26	3.88007	0.423048	9.1717	4.65621e-20	1.91246e-16	N.A.
T26C5.5	45065.4	3.50753	0.389443	9.00653	2.12672e-19	6.55135e-16	N.A.
F53C3.4	6452.29	3.44294	0.386329	8.91194	5.01461e-19	1.2358e-15	N.A.
F53H4.3	400.779	4.7136	0.55913	8.43024	3.44965e-17	7.08443e-14	N.A.
C07A12.2	14604.9	4.3477	0.53956	8.05787	7.76376e-16	1.36664e-12	N.A.
ilys-4	27252	3.34939	0.421476	7.94681	1.91375e-15	2.94765e-12	N.A.
Y73B6BL.35	28384	3.18849	0.431026	7.39744	1.38835e-13	1.9008e-10	N.A.
frpr-14	938.266	2.96447	0.404071	7.3365	2.19251e-13	2.70161e-10	K07E8.5 encodes a homolog of the functionally active Fmrf Receptor (FR\; CG2114) of D. melanogaster\; it is thus possible that K07E8.5 is a receptor for one of the FMRF-like neurotransmitters in C. elegans (e.g., FLP-1 through FLP-12).
21ur-15244	1633.29	3.33157	0.457454	7.28284	3.2686e-13	3.66143e-10	N.A.
flp-12	121484	2.65772	0.397143	6.6921	2.19996e-11	2.25899e-08	flp-12 encodes a predicted FMRFamide-like peptide neurotransmitter that affects locomotion when injected into A. suum\; expressed in the ASE and PVM sensory neurons.
T02D1.4	779.353	3.01368	0.452685	6.65734	2.7882e-11	2.64278e-08	N.A.
F46F2.3	3246.87	-2.51692	0.398515	-6.31575	2.68848e-10	2.36624e-07	N.A.
zig-2	5345.34	3.42871	0.55226	6.20851	5.34908e-10	4.39409e-07	zig-2 encodes a predicted secreted protein that is a member of the immunoglobulin superfamily of proteins\; a zig-2::gfp reporter fusion is expressed in the PVT interneuron and weakly in 4-6 additional head neurons.
nlp-1	24028.9	2.57574	0.418869	6.14928	7.78363e-10	5.99437e-07	nlp-1 encodes a predicted neuropeptide-like protein of the MSFamide family with similarity to Aplysia californica (sea hare) buccalin, a neuropeptide that regulates acetylcholine-induced muscle contraction\; NLP-1 is expressed in the phasmid PHB tail sensory neuron, lateral neurons, head neurons, and the intestine\; the precise role of NLP-1 in nervous system function and development is not yet k…
F55H12.3	347.25	2.91542	0.475348	6.13324	8.61053e-10	6.24111e-07	N.A.
Y45F10C.4	2552.63	-2.37292	0.389926	-6.08557	1.16075e-09	7.94599e-07	N.A.
ins-29	208.178	3.49547	0.58412	5.98416	2.17508e-09	1.4106e-06	ins-29 encodes predicted type-alpha insulin-like molecule that lacks a C peptide domain and does not have an A6\/A11 disulfide bond.
lite-1	6368.5	2.18409	0.366005	5.96737	2.41104e-09	1.48544e-06	lite-1 encodes a eight-transmembrane protein that is a member of the invertebrate family of Gustatory receptors\; LITE-1 functions in neurons as an ultraviolet light receptor required for proper avoidance (photophobic) response to short-wavelength light\; ectopic expression of LITE-1 in other tissues, namely body wall and vulval muscles, is sufficient to confer light-responsive muscle contraction…
F41G3.1	9129.22	2.22266	0.375966	5.91188	3.38232e-09	1.98462e-06	N.A.
F15E6.3	591.13	-2.81148	0.489869	-5.73925	9.50962e-09	5.32625e-06	N.A.
B0286.3	6080.92	2.19737	0.392757	5.59474	2.2095e-08	1.09624e-05	N.A.
F28F9.3	1065.47	2.76062	0.492319	5.60738	2.05409e-08	1.09624e-05	N.A.
ppat-1	1412.01	2.41315	0.431413	5.5936	2.22415e-08	1.09624e-05	N.A.
sfrp-1	1833.71	-2.2902	0.416835	-5.49425	3.92366e-08	1.85951e-05	N.A.
col-93	20920.7	-1.95998	0.357229	-5.48663	4.09675e-08	1.86964e-05	N.A.
F38E9.6	3394.12	2.33044	0.428108	5.44358	5.22209e-08	2.21885e-05	N.A.
cwp-1	92.2091	3.29812	0.605462	5.44728	5.11469e-08	2.21885e-05	cwp-1 encodes a nematode-specific protein that is coexpressed with lov-1 and pkd-2.
odr-10	382.231	3.25227	0.600441	5.41647	6.07879e-08	2.49676e-05	odr-10 encodes a seven transmembrane G protein-coupled olfactory receptor\; ODR-10 activity is required, in the AWA neurons, for the attractive response to low concentrations of diacetyl\; ODR-10 is strongly expressed in the cilia of the AWA olfactory neurons and, at low levels, in the CEP neurons\; expression of odr-10 mRNA and of an odr-10::GFP fusion gene is greatly reduced in odr-7 mutant ani…
C54D2.2	3999.61	2.36333	0.438714	5.38695	7.16647e-08	2.84855e-05	N.A.
daf-37	1508.51	2.4931	0.467769	5.32976	9.83403e-08	3.78672e-05	daf-37 encodes a G-protein coupled receptor (GPCR) that belongs to the serpentine receptor class w (Srw) family of chemoreceptors\; daf-37 functions in dauer signaling, upstream of the daf-11\/guanylyl cyclase, daf-7\/TGF-beta, and daf-2\/insulin signaling pathways\; daf-37 specifically senses and binds to a ascaroside (ascr#2), ascarosides are the major small-molecule components of the dauer phe…
flp-24	17715.1	2.28948	0.431314	5.30814	1.10749e-07	4.13529e-05	N.A.
nmr-2	1606.61	2.35945	0.449205	5.2525	1.50052e-07	5.43807e-05	nmr-2 encodes an ionotropic glutamate receptor (iGluR) subunit that is most similar to members of the NR2A subfamily of the NMDA class of iGluRs\; genetic analysis indicates that nmr-2 is required for full memory retention of a learned avoidance behavior, namely avoidance of NaCl after starvation conditioning\; in addition, NMR-2 activity is required for NMDA-gated currents in the AVA interneuron…
cbn-1	1310.96	2.03826	0.388872	5.24148	1.59293e-07	5.60802e-05	cbn-1 encodes a protein that contains a predicted signal peptide and calcium-binding EF-hand motifs.
F23F12.12	923.14	-2.13754	0.409752	-5.21666	1.82175e-07	6.23544e-05	N.A.
K10C9.1	2920.74	2.22605	0.433689	5.13284	2.8541e-07	9.50492e-05	N.A.
T22E5.1	13516	2.15198	0.420163	5.12178	3.0267e-07	9.81446e-05	N.A.
C04E6.13	2790.12	1.97254	0.399109	4.94235	7.71876e-07	0.000243873	N.A.
clec-190	1568.2	2.29244	0.46562	4.92341	8.50492e-07	0.000261994	N.A.
ceh-24	305.436	2.50305	0.508916	4.9184	8.72544e-07	0.000262231	ceh-24 encodes an NK class homeodomain protein orthologous to human NK2 Homeobox 1 (NKX2-1\; OMIM:600635) which is expressed in the thyroid, lung, and bronchial epithelia and which, when mutated, leads to disease.
flp-18	330776	2.07563	0.423427	4.90198	9.48739e-07	0.000278342	flp-18 encodes the only FMRFamide-related neuropeptide (FaRP) encoded by the C. elegans genome, other than flp-21, that activates the solitary (215V) form of NPR-1 in Xenopus oocytes\; in addition, FLP-18 can activated the social (215F) form of NPR-1 in pharyngeal assays\; FLP-18 is expressed in the interneurons AVA, AIY and RIG, the motor neuron RIM and the pharyngeal neurons M2 and M3.
F18E3.13	455.025	-2.41008	0.496414	-4.85497	1.20405e-06	0.000336008	N.A.
Y22D7AR.10	1469.78	-2.06853	0.426145	-4.85405	1.20964e-06	0.000336008	N.A.
nlp-13	56515.8	1.88512	0.388588	4.85121	1.2271e-06	0.000336008	nlp-13 encodes a predicted neuropeptide of the MSFamide family\; expressed primarily in neurons or in the endocrine\/secretory cells, and expression includes pharyngeal neurons that modulate pharyngeal pumping of food.
C02F12.5	742.611	-2.20827	0.459252	-4.80841	1.52139e-06	0.000407534	C02F12.5 encodes a putatively secreted protein with a Kunitz\/bovine pancreatic trypsin inhibitor domain\; C02F12.5 has no obvious function in mass RNAi assays.
gcy-11	1165.98	2.56306	0.536027	4.78158	1.73921e-06	0.000455968	N.A.
flp-11	20363.7	1.98068	0.415504	4.76693	1.8705e-06	0.000480174	N.A.
sre-22	420.517	2.21842	0.470341	4.71662	2.39796e-06	0.000603014	N.A.
C13A10.2	46223.4	1.92002	0.409694	4.68647	2.77956e-06	0.000684995	N.A.
nlp-21	255591	1.68698	0.361393	4.66798	3.0417e-06	0.000734899	nlp-21 encodes nine predicted neuropeptide-like proteins\; in C. elegans, nlp-21 is part of the GGARAF neuropeptide family that also contains nlp-9\; nlp-21 is expressed in a variety of neurons, including AFD, five head neurons, the ventral nerve cord, one anterior pharyngeal neuron, and one tail neuron\; nlp-21 expression is also detected in the embryo and the intestine\; NLP-21 is tranported by…
R13H7.2	1588.06	1.80415	0.387233	4.65909	3.17615e-06	0.000746497	N.A.
fbxb-67	347.271	-2.28756	0.491225	-4.65685	3.21087e-06	0.000746497	This gene encodes a protein containing an F-box, a motif predicted to mediate protein-protein interactions either with homologs of yeast Skp-1p or with other proteins\; its encoded protein also contains a Pfam-B45 motif of presently unknown function.
flp-9	140612	1.81859	0.391449	4.6458	3.3876e-06	0.000772999	flp-9 encodes a predicted FMRFamide-like peptide neurotransmitter that inhibits action potentials in the pharyngeal muscle when applied to the pharynx of dissected worms and inhibits movement when injected into A. suum\; expressed at highest levels prior to adulthood.
col-124	65835.3	-1.60567	0.34865	-4.60539	4.11693e-06	0.000922343	N.A.
C30B5.7	555.565	2.24515	0.488957	4.59171	4.39623e-06	0.000967327	N.A.
F15E6.4	368.858	-2.21856	0.483798	-4.58572	4.52415e-06	0.000978011	N.A.
flp-14	14909.5	1.96214	0.429229	4.57131	4.84694e-06	0.00102972	flp-14 encodes four copies of a single FMRFamide-related short peptide neurotransmitter\; FLP-14 can increase pharyngeal action potential frequency, although its exact role in C. elegans neurotransmission is not yet clear.
nlp-6	10785.5	1.65714	0.363232	4.5622	5.06203e-06	0.00105719	N.A.
C49C8.5	1484.34	1.95138	0.431547	4.52182	6.13095e-06	0.00122384	N.A.
T26C5.4	665.439	2.35538	0.520524	4.52502	6.03896e-06	0.00122384	N.A.
col-159	2676.37	-1.70624	0.377412	-4.52089	6.15793e-06	0.00122384	N.A.
Y23B4A.2	1094.94	2.07794	0.462796	4.48997	7.12338e-06	0.00139324	capa-1 encodes a neuropeptide precursor that can produce a pyrokinin (PK)-like peptide and two periviscerokinin (PVK)-like peptides\; a synthetic peptide corresponding to the AFFYTPRI-NH2 sequence of CAPA-1 is able to bind and activate the G protein-coupled receptor encoded by NMUR-2 when the latter is expressed in HEK293T cells\; antibodies that recognize the protein products of CAPA-1 stain two…
F38B6.4	1579.53	2.16334	0.487322	4.43924	9.02772e-06	0.00173812	N.A.
ins-6	80.7901	2.65878	0.607086	4.37957	1.18914e-05	0.00225424	ins-6 encodes predicted type-beta insulin-like molecule that lacks a C peptide domain\; expressed throughout development and in some neurons beginning in the two-fold elongated embryo.
srd-28	63.9425	2.65937	0.611659	4.3478	1.37508e-05	0.00256724	N.A.
T05C12.11	440.22	2.17143	0.50032	4.34009	1.42423e-05	0.0026193	N.A.
fbxa-98	89.7179	2.64504	0.610686	4.33126	1.48261e-05	0.00268657	This gene encodes a protein containing an F-box, a motif predicted to mediate protein-protein interactions either with homologs of yeast Skp-1p or with other proteins\; this gene's encoded protein also contains an FTH\/DUF38 motif, which may also mediate protein-protein interaction.
elt-2	840.298	2.247	0.520703	4.31532	1.59369e-05	0.00284601	elt-2 encodes a GATA-type transcription factor most similar to the vertebrate GATA4-6 transcription factors required for cardiac and endoderm development (OMIM:601656, 600576)\; in C. elegans, ELT-2 is required redundantly with ELT-7 for initiating and maintaining terminal differentiation of the intestine and for regulating the intestinal innate immune respone\; ELT-2 is expressed solely in the i…
K01A6.4	224.277	2.40263	0.561806	4.27661	1.89761e-05	0.00321583	N.A.
col-179	7495.69	-1.58918	0.371505	-4.27767	1.88856e-05	0.00321583	N.A.
flp-22	47206.1	1.62401	0.379914	4.27468	1.91408e-05	0.00321583	N.A.
hlh-32	338.581	2.09493	0.490306	4.27269	1.93127e-05	0.00321583	hlh-32 encodes a basic helix-loop-helix (bHLH) transcription factor similarto the vertebrate Olig2 proteins that play a role in motoneuron andoligodendrocyte development\; genetic analyses suggest that, along withhlh-17, hlh-31 and vab-3, hlh-32 may play a redundant role in regulation of ventral cephalic sheath (CEPsh) glia function, as assayed by AWC axonaldefects\; an hlh-32::gfp promoter fusio…
lgc-10	369.148	2.0443	0.477688	4.27958	1.8725e-05	0.00321583	N.A.
C10E2.5	206.696	2.20514	0.517675	4.25971	2.04693e-05	0.00336297	N.A.
Y113G7A.15	1886.13	1.91624	0.451621	4.24303	2.20522e-05	0.00357535	N.A.
Y47G6A.33	2742.1	-1.53986	0.363271	-4.23888	2.24638e-05	0.00359479	N.A.
cht-1	248.967	-2.22216	0.529178	-4.19927	2.67775e-05	0.00423016	cht-1 encodes a chitinase orthologous to human chitinase-1 (OMIM:600031, mutations are associated with chitotriosidase deficiency)\; CHT-1 is predicted to function as an extracellular O-glycosyl hydrolase that hydrolyzes the glycosidic bond between two or more carbohydrates\; in C. elegans, CHT-1 may play a role in embryogenesis, and may also be required for cuticle degradation during molting and…
F59A6.12	671.801	-1.74877	0.417656	-4.1871	2.82545e-05	0.00440699	N.A.
T23F2.4	94.914	2.55673	0.611582	4.18051	2.90854e-05	0.00442482	N.A.
cpi-1	3446.28	-1.61359	0.38598	-4.1805	2.9087e-05	0.00442482
glb-10	2655.22	1.67479	0.402602	4.15991	3.18372e-05	0.00478412	glb-10 encodes a globin\; glb-10 is expressed in pharynx, intestine, vulval muscle, and many neurons, with at least some subcellular localization to synapses.
nex-4	168.294	2.51315	0.606886	4.14106	3.4571e-05	0.00513233	nex-4 encodes a predicted annexin.
ift-81	620.784	2.25313	0.548189	4.11013	3.95437e-05	0.00580069	ift-81 encodes an ortholog of the intraflagellar transport component IFT-81 in Chlamydomonas\; ift-81 along with ift-74 is involved in growth, chemotaxis, intraflagellar transport and the morphogenesis of cilia\; ift-81 binds ift-74 in protein binding assays and co-localizes with ift-74 to the transition zone of cilia in neurons, indicating that ift-81 may form a complex with ift-74.
ech-7	8459.86	1.91278	0.465698	4.10734	4.00238e-05	0.00580204	N.A.
cec-4	656.11	-1.91296	0.467323	-4.09344	4.25017e-05	0.0060896	cec-4 is an ortholog of human CBX1 (chromobox 1), CBX5 (chromobox 5) and CBX3 (chromobox 3)\; CEC-4 is required for the perinuclear anchoring of chromatin methylated on histone H3 Lysine 9 (H3K9) in embryos\; the CEC-4 chromodomain is 42\% identical to human CBX1 (chromobox 1) chromodomain and CBX5 (chromobox 5) chromodomain\; CEC-4 has a large C-terminal domain that does not have homology to oth…
glb-19	2533.16	1.49233	0.365439	4.08367	4.43295e-05	0.00627848	glb-19 encodes a globin.
E02A10.4	2028.27	1.5921	0.390543	4.07662	4.56953e-05	0.00630576	N.A.
Y45F10C.2	188.419	-2.18507	0.536243	-4.07478	4.60573e-05	0.00630576	N.A.
lron-4	275.801	2.43841	0.597705	4.07962	4.51087e-05	0.00630576	N.A.
K09C6.9	327.528	1.95265	0.480627	4.06272	4.85036e-05	0.0065677	N.A.
F08A8.4	1010.51	1.69943	0.419097	4.05499	5.01372e-05	0.00657223	N.A.
nhr-41	993.938	1.63339	0.402352	4.05961	4.91547e-05	0.00657223	nhr-41 encodes a nuclear receptor of the NR2D1 subfamily that is orthologous to the Drosophila DHR78 nuclear receptor essential for the onset of metamorphosis, and the mammalian TR2 and TR4 receptors which are expressed in androgen-sensitive organs and brain tissue, respectively\; by homology, NHR-41 likely functions as a transcription factor that, based upon RNAi experiments, plays a role in the…
npr-6	449.877	1.89609	0.467446	4.05628	4.98607e-05	0.00657223	N.A.
C08F11.11	26425.1	-1.38064	0.341773	-4.03965	5.35309e-05	0.00687091	N.A.
aptf-1	58.2851	2.46898	0.610994	4.04092	5.32424e-05	0.00687091	aptf-1 encodes one of four C. elegans AP-2-like transcription factors\; APTF-1 activity is required in the RIS interneuron for sleep-like quiescence induced by neuropeptide signaling\; aptf-1 is expressed in five head interneurons.
dod-22	224.581	2.18849	0.544866	4.01656	5.90526e-05	0.00750151	N.A.
ador-1	1483.75	1.93073	0.481235	4.01203	6.01994e-05	0.00756915	N.A.
T10G3.8	1522.06	1.54583	0.386275	4.00188	6.28416e-05	0.00774334	N.A.
T12B5.15	1956.05	-1.88877	0.47185	-4.0029	6.25699e-05	0.00774334	N.A.
T20D4.11	318.761	1.98778	0.497529	3.99529	6.46139e-05	0.00788289	N.A.
D2023.3	1116.39	1.65967	0.415873	3.99082	6.58451e-05	0.00795435	N.A.
tre-2	24168.5	-1.52454	0.38262	-3.98448	6.76293e-05	0.00809057	tre-2 encodes one of four C. elegans trehalases\; tre-2 is expressed throughout development.
D1053.3	491.08	1.75153	0.441553	3.96675	7.28581e-05	0.00856834	N.A.
M199.9	219.631	2.40635	0.607053	3.96398	7.37091e-05	0.00856834	N.A.
cwp-2	111.444	2.42427	0.611543	3.96419	7.36449e-05	0.00856834	cwp-2 encodes a nematode-specific protein that is coexpressed with lov-1 and pkd-2.
tyra-2	1664.95	1.77655	0.450031	3.94761	7.89339e-05	0.00908994	N.A.
nhr-203	232.717	2.09398	0.53273	3.93066	8.4713e-05	0.00966513	N.A.
W10C4.1	1278.86	-1.74901	0.445744	-3.9238	8.71646e-05	0.0098536	N.A.
acox-1	2262.37	1.48373	0.380156	3.90294	9.50304e-05	0.0106451	N.A.
W02D7.4	445.268	1.91733	0.492142	3.89588	9.7843e-05	0.0108007	N.A.
acdh-2	1677.02	-2.08335	0.534868	-3.89506	9.81724e-05	0.0108007	acdh-2 encodes a short-chain acyl-CoA dehydrogenase\; ACDH-2 is predicted to be a mitochondrial enzyme that catalyzes the first step of fatty acid beta-oxidation and thus plays a key role in energy production\; steady-state acdh-2 mRNA levels are under the control of the MDT-15 mediator complex subunit\; in addition, gene expression studies indicate that acdh-2 expression is downregulated in fast…
ins-27	470.629	1.9698	0.508307	3.87521	0.000106531	0.0115147	ins-27 encodes an insulin-like peptide.
nlp-11	86221.7	1.59736	0.412105	3.8761	0.000106143	0.0115147	N.A.
flr-2	8821.92	1.79581	0.463983	3.87042	0.000108647	0.0116412	N.A.
C15C7.4	554.352	1.66002	0.430148	3.85919	0.000113762	0.0120842	N.A.
C27H5.6	1119.36	1.79165	0.465378	3.84987	0.000118179	0.0123538	N.A.
C49C3.10	301.652	1.94136	0.504299	3.84961	0.000118304	0.0123538	N.A.
F18E3.11	308.925	-2.04367	0.532199	-3.84005	0.00012301	0.0126311	N.A.
nlp-3	3623.58	1.74414	0.454101	3.84087	0.0001226	0.0126311	nlp-3 encodes a neuropeptide-like protein of the GFxGF family with similarity to orcokinins, highly conserved peptides native to crustaceans that enhance hindgut contractions\; NLP-3 is expressed in neurons in the head, pharynx, and vulva, and in the intestine\; the precise role of NLP-3 in nervous system function and development is not yet clear.
col-160	21070.7	-1.33069	0.346899	-3.83596	0.000125073	0.0127368	N.A.
ZK892.4	53.1756	2.33691	0.609886	3.83172	0.000127251	0.0128523	ZK892.4 is orthologous to the human gene ALPHA-METHYLACYL-CoA RACEMASE (AMACR\; OMIM:604489), which when mutated leads to AMACR deficiency.
Y48E1B.8	90.9499	-2.30761	0.605408	-3.81166	0.000138039	0.0138286	N.A.
lin-39	3695.26	-1.65592	0.434797	-3.80848	0.000139823	0.0138943	lin-39 encodes a homeodomain protein homologous to the Deformed and Sex combs reduced family of homeodomain proteins\; lin-39 is required cell autonomously for specification of mid-body region cell fates, including those of the VC neurons and the vulval precursor cells (VPCs), during postembryonic development\; lin-39 activity is also required for normal migration of the QR, and to a lesser exten…
F32D8.1	658.154	1.68475	0.444686	3.78864	0.000151475	0.0149318	N.A.
nlp-8	39239.9	1.90909	0.505771	3.77462	0.000160253	0.0156717	N.A.
Y54G2A.10	335.568	1.77213	0.470283	3.76823	0.000164412	0.0159519	N.A.
lin-18	1319.95	1.44423	0.384536	3.75578	0.000172806	0.0166352	lin-18 encodes a predicted receptor tyrosine kinase that is a member of the Ryk\/Derailed family of tyrosine kinase-related receptors (OMIM:600524, mutations in humans are associated with cleft palate)\; in C. elegans, LIN-18 is required for establishing the polarity of the secondary vulval cell lineage produced by the P7.p vulval precursor cell\; LIN-18 may be a receptor for Wnt-like signaling m…
Y51H7C.1	1000.53	-1.56311	0.416523	-3.75276	0.000174896	0.016706	N.A.
T10C6.7	461.526	-1.84603	0.493467	-3.74095	0.00018333	0.0173768	This gene encodes a protein containing an F-box, a motif predicted to mediate protein-protein interactions either with homologs of yeast Skp-1p or with other proteins.
gst-10	1904.52	1.63214	0.436518	3.73899	0.00018476	0.0173788	gst-10 encodes a glutathione S-transferase with similarity to the pi class of human glutathione S-transferases\; GST-10 catalyzes the conjugation of glutathione to 4-hydroxynonenal in vitro.
col-8	43459.1	-1.30157	0.349268	-3.72657	0.000194106	0.0181195	col-8 encodes a collagen, individually dispensable for viability and gross morphology, which is specifically expressed in dauers and adults but not in eggs or L4 larvae, like col-7, col-18, and col-19\; the amino- and carboxyl-terminal cysteine-rich regions of COL-8 are most closely related to those of COL-19, COL-35, and COL-39.
ags-3	17999	1.42366	0.382677	3.72025	0.000199023	0.0184388	ags-3 encodes a protein containing N-terminal TRP domains and C-terminal GPR domains that is a member of the Activator of G Protein Signaling 3 (AGS3) family of proteins that includes mammalian AGS3 and LPN and Drosophila RAPSYNOID\; in C. elegans, AGS-3 is involved in polarity and spindle orientation during early embryogenesis\; in addition, AGS-3, along with the RIC-8 guanine nucleotide exchang…
col-20	82410.9	-1.32059	0.355337	-3.71644	0.00020205	0.0185796	col-20 encodes a collagen\; its expression pattern and mutant phenotypes are unknown.
irk-1	996.361	1.50855	0.40669	3.70935	0.000207791	0.018966	N.A.
F31F7.1	2349.06	1.50352	0.40645	3.69914	0.000216331	0.0196003	N.A.
C32H11.3	99.6554	2.25803	0.611097	3.69504	0.000219856	0.0197742	N.A.
C13A2.12	311.284	-1.77954	0.482769	-3.68612	0.000227697	0.020331	N.A.
nhr-8	417.651	1.84478	0.501172	3.68092	0.000232392	0.0206009	The nhr-8 gene encodes a nuclear hormone receptor homolog\; nhr-8(ok186) mutants have abnormally low resistance to the toxins colchicine and chloroquine.
F58H1.7	33470.3	1.67742	0.456843	3.67176	0.00024089	0.0212018	N.A.
C18B2.2	1158.7	-1.69867	0.46521	-3.6514	0.000260815	0.0227926	N.A.
C35B1.4	4910.83	-1.5644	0.428878	-3.64765	0.000264652	0.0229651	N.A.
fax-1	65.5354	2.22839	0.611242	3.64567	0.000266694	0.0229804	fax-1 encodes a conserved nuclear receptor that contains two C4-type zinc fingers and is orthologous to the vertebrate photoreceptor-specific nuclear receptor PNR (OMIM:604485, mutated in enhanced S-cone syndrome and retinitis pigmentosa)\; fax-1 is required for normal locomotion and neuron fate specification, including specification of the AVA, AVE, and AVK interneurons and proper axon pathfindi…
B0507.3	303.639	1.78836	0.491164	3.64107	0.000271511	0.0230703	N.A.
C14C6.5	514.482	-1.8126	0.4983	-3.63757	0.000275226	0.0230703	C14C6.5 encodes a protein that contains a Metridin-like ShK toxin domain\; C14C6.5 is involved in the transcriptional, innate immune response towards several different bacterial pathogens.
C52B11.5	1560.17	1.72262	0.473436	3.63854	0.000274186	0.0230703	N.A.
ZC404.1	226.995	1.85423	0.509415	3.63993	0.000272712	0.0230703	N.A.
T20D4.12	227.617	2.21665	0.611641	3.6241	0.000289975	0.0241423	N.A.
glb-29	1295.36	1.6598	0.458265	3.62192	0.000292429	0.0241833	glb-29 encodes a globin with no obvious function in mass RNAi assays\; glb-29 expression is induced by anoxia in a HIF-1 dependent manner, although it is also paradoxically upregulated in a hif-1 mutant background.
T23B7.3	2839.58	1.50159	0.415278	3.61587	0.000299335	0.0245894	N.A.
vit-3	5750.61	-1.53107	0.424249	-3.60891	0.000307492	0.0250921	vit-3 encodes a vitellogenin, a precursor of the lipid-binding protein related to vertebrate vitellogenins and mammalian ApoB-100, a core LDL particle constituent (OMIM:107730)\; VIT-3 is a major yolk component, but as loss of VIT-3 activity via RNA-mediated interference (RNAi) does not result in any abnormalities, VIT-3 likely functions redundantly with other vitellogenins to provide essential n…
C46C2.5	832.589	-1.50488	0.417776	-3.60211	0.000315642	0.0254682	N.A.
abt-2	8551.77	-1.812	0.503253	-3.60059	0.000317501	0.0254682	abt-2 encodes a predicted ATP-binding cassette (ABC) transporter that is a member of the ABCA subfamily of transport proteins\; ABT-2 is predicted to function as a transmembrane protein that couples energy to transport of various molecules across membranes.
glr-1	546.666	1.69123	0.469795	3.59993	0.000318301	0.0254682	glr-1 encodes an AMPA-type ionotropic glutamate receptor\; GLR-1 activity is required for mediating the behavioral response to light nose touch and the frequency with which animals change locomotory direction in response to sensory cues such as food\; GLR-1 is also required for memory formation\; GLR-1 and GLR-2, a second AMPA-type ionotropic glutamate receptor, can interact to form functional he…
F41B4.2	3634.31	1.6268	0.452765	3.59304	0.000326837	0.0258261	N.A.
K09H11.1	1168.08	1.39746	0.388946	3.59294	0.000326966	0.0258261	K09H11.1 encodes an acyl CoA dehydrogenase\; by homology, the product of K09H11.1 is predicted to function in fatty acid beta-oxidation\; K09H11.1::yfp promoter fusions are expressed in the descendants of the tertiary vulval precursor cells P3.p, P4.p, and P8.p\; large-scale expression studies reveal additional expression in the nervous system, intestine, and hypodermis.
C53C11.5	761.836	1.66236	0.463088	3.58972	0.000331032	0.0259181	N.A.
acl-7	3562.09	1.71155	0.476927	3.5887	0.000332337	0.0259181	acl-7 is an ortholog of human GNPAT (glyceronephosphate O-acyltransferase)\; ACL-7 is required for the biosynthesis of ether lipids.
R12G8.1	286.885	2.03598	0.56861	3.58063	0.000342769	0.0260716	N.A.
T12A2.5	69.5635	2.18049	0.608739	3.58197	0.000341015	0.0260716	N.A.
T26H5.10	499.567	2.05949	0.575106	3.58106	0.0003422	0.0260716	N.A.
col-74	138.631	-2.16635	0.604629	-3.58293	0.000339757	0.0260716	N.A.
K01A12.3	181.838	1.9502	0.545414	3.57563	0.000349383	0.0260915	N.A.
col-98	17792.6	-1.37798	0.385289	-3.57648	0.000348252	0.0260915	N.A.
vit-1	4771.26	-1.45996	0.408151	-3.57701	0.000347546	0.0260915	N.A.
C46H11.2	314.342	1.70122	0.476843	3.56768	0.000360155	0.0263393	N.A.
Y105E8B.5	4645.32	1.568	0.439488	3.5678	0.000359989	0.0263393	hprt-1 encodes an ortholog of human HYPOXANTHINE PHOSPHORIBOSYLTRANSFERASE 1 (HPRT1), which when mutated leads to Lesch-Nyhan syndrome (OMIM:308000).
glb-27	1196.6	1.64847	0.461822	3.56949	0.000357683	0.0263393	glb-27 encodes a globin whose expression is probably induced by anoxia in a HIF-1-dependent manner\; glb-27 transcription is higher in L3 and dauers than in young adults\; glb-27 has no obvious function in mass RNAi assays.
nlp-46	51.0079	2.17389	0.609466	3.56688	0.000361251	0.0263393	N.A.
Y82E9BR.13	280.231	1.77975	0.499405	3.56373	0.000365616	0.0265007	N.A.
cdr-4	2321.24	1.41069	0.396791	3.55525	0.000377614	0.0270914	cdr-4 encodes a predicted transmembrane protein that is a member of the CDR (cadmium responsive) family of proteins\; cdr-4 expression is upregulated in response to cadmium treatment.
snb-2	591.429	1.80701	0.50832	3.55487	0.000378163	0.0270914	N.A.
C35B1.7	726.691	1.72449	0.486214	3.54677	0.000389986	0.0275209	N.A.
flp-15	8910.01	1.6339	0.460749	3.54618	0.000390858	0.0275209	flp-15 encodes two FMRFamide-related short peptide neurotransmitter\; the precise roles for these peptides in C. elegans neurotransmission are not yet known.
tba-7	590.542	1.71469	0.483123	3.54918	0.000386437	0.0275209	N.A.
dao-3	4499.35	1.48948	0.420306	3.54381	0.000394393	0.027612	dao-3 encodes a protein containing tetrahydrofolate dehydrogenase\/cyclohydrolase catalytic and NAD(P)-binding domains\; by similarity to mammalian enzymes, DAO-3 is predicted to function in one-carbon unit metabolism and thus, in amino acid and nucleotide biosynthesis\; dao-3 expression appears to be regulated by daf-2-mediated insulin signaling: microarray experiments suggest that it is upregul…
R12C12.1	2918.83	1.50719	0.426956	3.53007	0.000415443	0.0283212	R12C12.1 is orthologous to human GLYCINE DECARBOXYLASE (GLDC\; OMIM:238300), which when mutated leads to glycine encephalopathy.
T28B8.1	8124.17	-1.26485	0.358087	-3.53224	0.000412052	0.0283212	N.A.
col-19	57135.6	-1.24063	0.351171	-3.53283	0.000411145	0.0283212	col-19 encodes a member of the collagen superfamily containing collagen triple helix repeats (20 copies) that is required for normal structure of the alae\; expressed during the L2-to-dauer and L4-to-adult molts with strongest expression in adult animals.
nhr-35	1038.44	1.43166	0.40554	3.53024	0.000415175	0.0283212	N.A.
shw-3	394.306	1.61302	0.456984	3.52971	0.000416016	0.0283212	N.A.
lys-4	4220.74	-1.27507	0.361605	-3.52614	0.000421657	0.0285476	N.A.
cgr-1	589.29	1.61336	0.458146	3.52149	0.000429127	0.0288946	N.A.
alh-12	2948.57	1.42078	0.404162	3.51536	0.000439159	0.0294093	N.A.
K07D4.9	5439.12	1.62666	0.465155	3.49703	0.000470475	0.0311677	N.A.
col-158	117.657	-1.97826	0.565515	-3.49815	0.000468497	0.0311677	N.A.
D1054.8	1400.13	1.67114	0.478478	3.49261	0.000478323	0.0315182	N.A.
col-80	47469.4	-1.21602	0.348633	-3.48795	0.00048673	0.0319015	N.A.
spin-3	203.864	1.90689	0.548673	3.47547	0.000509967	0.0332477	N.A.
hacd-1	7963.05	1.73985	0.501226	3.47118	0.000518168	0.0336046	N.A.
sto-2	963.68	1.40461	0.405911	3.4604	0.000539374	0.0347967	N.A.
F08G5.3	19910.4	-1.22806	0.355208	-3.45731	0.000545596	0.034855	N.A.
aex-4	168.518	1.85012	0.53516	3.45714	0.000545936	0.034855	N.A.
alh-10	1100.96	-1.38344	0.400444	-3.45475	0.000550798	0.0349842	N.A.
btb-9	320.989	1.93158	0.559534	3.45212	0.000556209	0.0351467	N.A.
ceh-60	527.74	1.51623	0.441047	3.4378	0.00058646	0.0368692	ceh-60 encodes one of three C. elegans homeodomain proteins (CEH-20, CEH-40, and CEH-60) homologous to Extradenticle (Exd\/Pbx)\; loss of ceh-60 activity via large-scale RNAi results in reduced fat content, sterility, and variable embryonic lethality.
sulp-1	487.565	2.09388	0.610933	3.42735	0.000609505	0.0381235	sulp-1 encodes one of eight C. elegans members of the sulfate permease family of anion transporters\; by homology, SULP-1 is predicted to function as an anion transporter that regulates cellular pH and volume via transmembrane movement of electrolytes and fluids\; a sulp-1::GFP transcriptional fusion is expressed strongly in several neurons, weakly in hypodermal cells and the intestine, and very …
ZC317.7	123.563	-2.01295	0.588878	-3.41828	0.000630176	0.0391305	N.A.
fard-1	4033.68	1.59631	0.467096	3.41751	0.000631957	0.0391305	fard-1 is an ortholog of human FAR2 (fatty acyl CoA reductase 2) and FAR1 (fatty acyl CoA reductase 1)\; fard-1 is predicted to have fatty-acyl-CoA reductase (alcohol-forming) activity, based on protein domain information\; FARD-1 is required for the formation of ether lipids.
nlp-38	22800.9	1.40326	0.412181	3.40448	0.000662899	0.0408412	N.A.
F40A3.4	403.621	1.67996	0.494728	3.39572	0.000684478	0.0419609	N.A.
C16D9.9	1140.21	1.57413	0.464508	3.38881	0.000701976	0.0422218	N.A.
C27A7.8	530.115	-1.5918	0.470117	-3.38596	0.000709293	0.0422218	N.A.
catp-3	378.053	-1.87563	0.553481	-3.38878	0.000702045	0.0422218	N.A.
gst-11	2086.4	1.2581	0.371489	3.38663	0.000707561	0.0422218	N.A.
nep-21	11943.4	-1.41765	0.418458	-3.38779	0.000704569	0.0422218	N.A.
twk-39	18560.1	-1.20516	0.355653	-3.3886	0.000702506	0.0422218	N.A.
F52A8.3	4377.07	-1.36853	0.404475	-3.38348	0.000715732	0.0424002	N.A.
K10D11.5	238.469	1.80686	0.535773	3.37244	0.00074506	0.0437173	N.A.
nhr-114	4277.77	1.53533	0.45511	3.37354	0.000742076	0.0437173	nhr-114 encodes, by alternative splicing, two isoforms of a nuclear hormone receptor that specifically binds GPA-13 in yeast two-hybrid assays\; the interaction of NHR-114 with GPA-13 is independent of whether GPA-13 is constitutively activated or not\; NHR-114 is expressed in intestine (and weakly in hypodermal cells), with mainly nuclear localization.
prk-2	1031.59	1.55096	0.460113	3.37083	0.000749414	0.0437643	N.A.
flp-7	8638.48	1.47687	0.438499	3.368	0.000757148	0.0440074	flp-7 encodes an MVRFamide-containing peptide that, upon injection into A. suum, produces paralysis and loss of locomotory waveforms, increased body length, and decreased cAMP production.
frpr-18	985.531	1.58655	0.471922	3.3619	0.000774088	0.0447808	frpr-18 encodes, by alternative splicing, two G-protein coupled receptors for the flp-2-encoded peptides SPREPIRFamide (FLP2-A) and LRGEPIRFamide (FLP2-B)\; T19F4.1B protein has an extension of 30 residues more than T19F4.1A in the intracellular C-terminal region\; T19F4.1A\/B are probably linked to the G(q) pathway.
glb-33	2724.9	1.32719	0.394952	3.36038	0.000778364	0.0448177	glb-33 encodes a unusual protein with an N-terminal G-protein-coupled\/7-transmembrane receptor (GPCR\/7TM) domain, and a C-terminal globin domain\; glb-33 expression is probably induced by anoxia in a HIF-1-dependent manner\; glb-33 has no obvious function in mass RNAi assays.
hpd-1	8050.22	1.28964	0.384644	3.35282	0.000799926	0.0458451	hpd-1 encodes a putative 4-hydroxyphenylpyruvate dioxygenase requiredfor normally short lifespan and for negative regulation of the dauer larval stage, with loss of hpd-1 function prolonging lifespan andpromoting dauer formation\; hpd-1 is a (perhaps evolutionarily conserved)target of transcriptional activation by DAF-16\; HPD-1 is orthologous tohuman HPD (OMIM:609695, mutated in tyrosinemia type…
C17H11.1	3290.06	1.24444	0.372118	3.34419	0.000825221	0.0465066	N.A.
T06G6.12	362.668	1.81363	0.542316	3.34423	0.000825112	0.0465066	N.A.
col-103	16616.8	-1.30251	0.389387	-3.34503	0.000822741	0.0465066	col-103 encodes a collagen.
col-119	122668	-1.19357	0.357062	-3.34274	0.000829558	0.0465066	N.A.
nmur-4	1007.87	-1.44781	0.433153	-3.34248	0.00083034	0.0465066	N.A.
C45E1.4	707.022	1.61381	0.483429	3.33826	0.00084306	0.0470054	N.A.
Y75B8A.28	287.049	1.69243	0.507632	3.33397	0.000856153	0.0475203	N.A.
R07C12.2	254.923	1.83899	0.552142	3.33065	0.000866427	0.0477551	N.A.
fbxa-14	239.822	1.95512	0.587105	3.3301	0.000868133	0.0477551	N.A.
C05C8.8	357.43	-1.9636	0.591228	-3.32123	0.000896232	0.0490816	N.A.
